# Supplementary material for: Quercetin Protects Saccharomyces cerevisiae against Oxidative Stress by Inducing Trehalose Biosynthesis and the Cell Wall Integrity Pathway
Source: PubMed Central journal article supplement (PMC3445532; doi:10.1371/journal.pone.0045494), 2012-09-18
Supplement: pone.0045494.s001.pdf [file pone.0045494.s001.pdf]

**Table S1 Genes up regulated in quercetin treated cells.** *S. cerevisiae* BY4741 was grown to exponential phase in YPD medium and treated with 300  $\mu$ M of quercetin or equal volume of DMSO (control cells) for 15 min. Genes differentially regulated (quercetin vs control) were sorted into functional categories according to MIPS; some genes were listed in more than one category.

| Gene Name                                          | Fold change | Gene product                                                                                                                                                                                                                          |
|----------------------------------------------------|-------------|---------------------------------------------------------------------------------------------------------------------------------------------------------------------------------------------------------------------------------------|
| <b>Amino acid metabolism</b>                       |             |                                                                                                                                                                                                                                       |
| "DUR1,2"                                           | 3.0         | urea amidolyase (contains urea carboxylase and allophanate hydrolase)                                                                                                                                                                 |
| SHM1                                               | 2.0         | "Serine hydroxymethyltransferase, mitochondrial"                                                                                                                                                                                      |
| ILV6                                               | 2.6         | "Regulatory subunit of acetolactate synthase, which catalyzes the first step of branched-chain amino acid biosynthesis; enhances activity of the Ilv2p catalytic subunit, localizes to mitochondria"                                  |
| ILV1                                               | 2.0         | threonine deaminase                                                                                                                                                                                                                   |
| THR1                                               | 2.1         | homoserine kinase                                                                                                                                                                                                                     |
| APE2                                               | 3.4         | aminopeptidase yscII                                                                                                                                                                                                                  |
| ECM38                                              | 2.2         | gamma-glutamyltransferase homolog                                                                                                                                                                                                     |
| CAR2                                               | 2.7         | ornithine aminotransferase                                                                                                                                                                                                            |
| GCV2                                               | 2.3         | glycine cleavage system P subunit glycine decarboxylase complex P subunit glycine synthase P subunit                                                                                                                                  |
| GAD1                                               | 2.2         | glutamate decarboxylase                                                                                                                                                                                                               |
| ZWF1                                               | 3.3         | glucose-6-phosphate dehydrogenase                                                                                                                                                                                                     |
| ARG1                                               | 2.0         | arginosuccinate synthetase                                                                                                                                                                                                            |
| GDH1                                               | 2.0         | NADP-specific glutamate dehydrogenase                                                                                                                                                                                                 |
| <b>Nucleotide/nucleoside/nucleobase metabolism</b> |             |                                                                                                                                                                                                                                       |
| CDC19                                              | 2.6         | pyruvate kinase                                                                                                                                                                                                                       |
| FUI1                                               | 2.0         | uridine permease                                                                                                                                                                                                                      |
| MEC1                                               | 2.4         | "Required for mitotic growth, DNA repair and mitotic recombination, regulates phosphorylation of Rad53p, required for dmc1 arrest and meiotic recombination, homolog of fission yeast Rad3 and human ATR"                             |
| "DUR1,2"                                           | 3.0         | urea amidolyase (contains urea carboxylase and allophanate hydrolase)                                                                                                                                                                 |
| SDS24                                              | 2.1         | "Similar to <i>S. pombe</i> SDS23, suppresses DIS2, localized to the nucleus"                                                                                                                                                         |
| SHM1                                               | 2.0         | "Serine hydroxymethyltransferase, mitochondrial"                                                                                                                                                                                      |
| GDA1                                               | 2.5         | guanosine diphosphatase of Golgi membrane                                                                                                                                                                                             |
| KEM1                                               | 2.2         | 5'-3' exonuclease                                                                                                                                                                                                                     |
| "ADE5,7"                                           | 2.1         | aminoimidazole ribotide synthetase glycinamide ribotide synthetase                                                                                                                                                                    |
| CYR1                                               | 2.5         | adenylate cyclase                                                                                                                                                                                                                     |
| URA2                                               | 2.5         | aspartate transcarbamylase carbamoyl phosphate synthetase glutamine amidotransferase                                                                                                                                                  |
| JSN1                                               | 2.1         | benomyl dependent tubulin mutant                                                                                                                                                                                                      |
| DCS1                                               | 1.9         | "Non-essential hydrolase involved in mRNA decapping, may function in a feedback mechanism to regulate deadenylation, contains pyrophosphatase activity and Ja HIT (histidine triad) Jmotif; interacts with neutral trehalase Nth1pJJ" |
| ADE17                                              | 2.6         | 5-aminoimidazole-4-carboxamide ribonucleotide (AICAR) transformylase/IMP cyclohydrolase                                                                                                                                               |
| SRV2                                               | 2.4         | 70 kDa adenylate cyclase-associated protein                                                                                                                                                                                           |
| IRA2                                               | 2.3         | GTPase activating protein highly homologous to Ira1p neurofibromin homolog                                                                                                                                                            |
| PYK2                                               | 2.6         | "Pyruvate kinase, glucose-repressed isoform"                                                                                                                                                                                          |
| <b>Phosphate metabolism</b>                        |             |                                                                                                                                                                                                                                       |
| CDC19                                              | 2.6         | pyruvate kinase                                                                                                                                                                                                                       |
| SEC18                                              | 2.1         | ATPase NSF protein involved in protein transport between ER and Golgi                                                                                                                                                                 |

| Gene Name      | Fold change | Gene product                                                                                                                                                                                              |
|----------------|-------------|-----------------------------------------------------------------------------------------------------------------------------------------------------------------------------------------------------------|
| <i>MEC1</i>    | 2.4         | "Required for mitotic growth, DNA repair and mitotic recombination, regulates phosphorylation of Rad53p, required for dmc1 arrest and meiotic recombination, homolog of fission yeast Rad3 and human ATR" |
| <i>GLK1</i>    | 3.0         | glucokinase                                                                                                                                                                                               |
| <i>TPS2</i>    | 2.2         | trehalose-6-phosphate phosphatase                                                                                                                                                                         |
| <i>KIN1</i>    | 2.0         | Serine/threonine protein kinase                                                                                                                                                                           |
| <i>PDR15</i>   | 2.0         | multidrug resistance transporter (putative)                                                                                                                                                               |
| <i>GDA1</i>    | 2.5         | guanosine diphosphatase of Golgi membrane                                                                                                                                                                 |
| <i>GAL83</i>   | 2.0         | Glucose repression protein                                                                                                                                                                                |
| <i>PTC2</i>    | 2.1         | protein phosphatase type 2C                                                                                                                                                                               |
| <i>CHD1</i>    | 2.3         | transcriptional regulator                                                                                                                                                                                 |
| <i>HXK1</i>    | 5.2         | hexokinase I (PI) (also called hexokinase A)                                                                                                                                                              |
| <i>PIL1</i>    | 2.4         | Phosphorylation Inhibited by Long chain base                                                                                                                                                              |
| <i>THR1</i>    | 2.1         | homoserine kinase                                                                                                                                                                                         |
| <i>KSP1</i>    | 2.6         | Serine/threonine kinase similar to casein kinase II and other serine/threonine protein kinases                                                                                                            |
| <i>SCH9</i>    | 2.1         | cAMP-dependent protein kinase homolog suppressor of cdc25ts                                                                                                                                               |
| <i>TPK1</i>    | 2.0         | cAMP-dependent protein kinase catalytic subunit (putative)                                                                                                                                                |
| <i>SSC1</i>    | 2.4         | mitochondrial matrix protein involved in protein import Endo.Sccl endonuclease subunit                                                                                                                    |
| <i>HSP104</i>  | 2.4         | heat shock protein 104                                                                                                                                                                                    |
| <i>YBT1</i>    | 2.1         | "Yeast bile transporter, similar to mammalian bile transporter"                                                                                                                                           |
| <i>DAK1</i>    | 2.0         | dihydroxyacetone kinase (putative)                                                                                                                                                                        |
| <i>YNR047W</i> | 2.1         | questionable protein                                                                                                                                                                                      |
| <i>INP53</i>   | 2.0         | inositol polyphosphate 5-phosphatase                                                                                                                                                                      |
| <i>PYK2</i>    | 2.6         | "Pyruvate kinase, glucose-repressed isoform"                                                                                                                                                              |

#### C-compound and carbohydrate metabolism

|              |     |                                                                                                                                                                                                      |
|--------------|-----|------------------------------------------------------------------------------------------------------------------------------------------------------------------------------------------------------|
| <i>CDC19</i> | 2.6 | pyruvate kinase                                                                                                                                                                                      |
| <i>TPS1</i>  | 2.6 | trehalose-6-phosphate synthase/phosphatase complex 56 kDa synthase subunit                                                                                                                           |
| <i>PYC2</i>  | 2.5 | pyruvate carboxylase                                                                                                                                                                                 |
| <i>SHM1</i>  | 2.0 | "Serine hydroxymethyltransferase, mitochondrial"                                                                                                                                                     |
| <i>ILV6</i>  | 2.6 | "Regulatory subunit of acetolactate synthase, which catalyzes the first step of branched-chain amino acid biosynthesis; enhances activity of the Ilv2p catalytic subunit, localizes to mitochondria" |
| <i>GLK1</i>  | 3.0 | glucokinase                                                                                                                                                                                          |
| <i>SRB8</i>  | 2.7 | activation mediator subcomplex of RNA polymerase I holoenzyme                                                                                                                                        |
| <i>GPD1</i>  | 2.1 | glycerol-3-phosphate dehydrogenase                                                                                                                                                                   |
| <i>BSC1</i>  | 4.0 | Bypass of Stop Codon transcript encoded by this ORF shows a high level of stop codon bypass                                                                                                          |
| <i>NTH1</i>  | 2.3 | neutral trehalase                                                                                                                                                                                    |
| <i>TPS2</i>  | 2.2 | trehalose-6-phosphate phosphatase                                                                                                                                                                    |
| <i>ADR1</i>  | 2.7 | positive transcriptional regulator                                                                                                                                                                   |
| <i>SSN2</i>  | 2.2 | transcription factor                                                                                                                                                                                 |
| <i>EMI2</i>  | 2.7 | Early Meiotic Induction                                                                                                                                                                              |
| <i>GAL83</i> | 2.0 | Glucose repression protein                                                                                                                                                                           |
| <i>HXK1</i>  | 5.2 | hexokinase I (PI) (also called hexokinase A)                                                                                                                                                         |
| <i>CWH41</i> | 2.1 | glucosidase I                                                                                                                                                                                        |
| <i>PYC1</i>  | 2.5 | pyruvate carboxylase                                                                                                                                                                                 |
| <i>DIE2</i>  | 2.3 | glucosyltransferase                                                                                                                                                                                  |
| <i>ENO1</i>  | 2.1 | enolase I                                                                                                                                                                                            |
| <i>GRE3</i>  | 2.0 | aldose reductase                                                                                                                                                                                     |
| <i>BCY1</i>  | 2.0 | cAMP-dependent protein kinase regulatory subunit                                                                                                                                                     |
| <i>KGD1</i>  | 2.4 | alpha-ketoglutarate dehydrogenase                                                                                                                                                                    |
| <i>SUC2</i>  | 2.6 | invertase (sucrose hydrolyzing enzyme)                                                                                                                                                               |
| <i>PMT4</i>  | 2.0 | dolichyl phosphate-D-mannose:protein O-D-mannosyltransferase                                                                                                                                         |

| Gene Name      | Fold change | Gene product                                                                                                                                                                                        |
|----------------|-------------|-----------------------------------------------------------------------------------------------------------------------------------------------------------------------------------------------------|
| <i>GFA1</i>    | 3.2         | glucoseamine-6-phosphate synthase glutamine_fructose-6-phosphate amidotransferase                                                                                                                   |
| <i>SDH1</i>    | 2.2         | succinate dehydrogenase flavoprotein subunit                                                                                                                                                        |
| <i>GPI13</i>   | 2.0         | ER membrane localized phosphoryltransferase that adds phosphoethanolamine onto the third mannose residue of the glycosylphosphatidylinositol (GPI) anchor precursor; similar to human PIG-O protein |
| <i>PDC5</i>    | 2.3         | pyruvate decarboxylase                                                                                                                                                                              |
| <i>GSY2</i>    | 2.2         | glycogen synthase (UDP-glucose-starch glucosyltransferase)                                                                                                                                          |
| <i>ECM38</i>   | 2.2         | gamma-glutamyltransferase homolog                                                                                                                                                                   |
| <i>FKS1</i>    | 2.6         | "1,3-beta-D-glucan synthase"                                                                                                                                                                        |
| <i>DAK1</i>    | 2.0         | dihydroxyacetone kinase (putative)                                                                                                                                                                  |
| <i>TSL1</i>    | 4.7         | similar to TPS3 gene product trehalose-6-phosphate synthase/phosphatase complex 123 kDa regulatory subunit                                                                                          |
| <i>PGM2</i>    | 4.1         | phosphoglucomutase                                                                                                                                                                                  |
| <i>ADE17</i>   | 2.6         | 5-aminimidazole-4-carboxamide ribonucleotide (AICAR) transformylase/IMP cyclohydrolase                                                                                                              |
| <i>GCV2</i>    | 2.3         | glycine cleavage system P subunit glycine decarboxylase complex P subunit glycine synthase P subunit                                                                                                |
| <i>YMR237W</i> | 2.1         | questionable protein                                                                                                                                                                                |
| <i>TPS3</i>    | 3.1         | trehalose-6-phosphate synthase/phosphatase complex 115 kDa regulatory subunit                                                                                                                       |
| <i>LAT1</i>    | 2.5         | pyruvate dehydrogenase complex dihydrolipoamide acetyltransferase component (E2)                                                                                                                    |
| <i>ZWF1</i>    | 3.3         | glucose-6-phosphate dehydrogenase                                                                                                                                                                   |
| <i>YOL155C</i> | 2.1         | ORF                                                                                                                                                                                                 |
| <i>LSC1</i>    | 2.0         | "alpha subunit of succinyl-CoA ligase (synthetase; ATP-forming), a mitochondrial enzyme of the TCA cycle"                                                                                           |
| <i>KRE5</i>    | 2.2         | "appears to function early in (1,6)-beta-D-glucan synthesis pathway"                                                                                                                                |
| <i>PYK2</i>    | 2.6         | "Pyruvate kinase, glucose-repressed isoform"                                                                                                                                                        |
| <i>GPH1</i>    | 7.0         | glycogen phosphorylase                                                                                                                                                                              |

#### Lipid, fatty acid and isoprenoid metabolism

|                |     |                                                                                                                                                                                                     |
|----------------|-----|-----------------------------------------------------------------------------------------------------------------------------------------------------------------------------------------------------|
| <i>SWH1</i>    | 2.6 | Similar to mammalian oxysterol-binding protein                                                                                                                                                      |
| <i>SHM1</i>    | 2.0 | "Serine hydroxymethyltransferase, mitochondrial"                                                                                                                                                    |
| <i>GPD1</i>    | 2.1 | glycerol-3-phosphate dehydrogenase                                                                                                                                                                  |
| <i>GPI13</i>   | 2.0 | ER membrane localized phosphoryltransferase that adds phosphoethanolamine onto the third mannose residue of the glycosylphosphatidylinositol (GPI) anchor precursor; similar to human PIG-O protein |
| <i>HMG2</i>    | 2.1 | 3-hydroxy-3-methylglutaryl-coenzyme A (HMG-CoA) reductase isozyme                                                                                                                                   |
| <i>YML059C</i> | 2.1 | questionable protein                                                                                                                                                                                |
| <i>DAK1</i>    | 2.0 | dihydroxyacetone kinase (putative)                                                                                                                                                                  |
| <i>INP53</i>   | 2.0 | inositol polyphosphate 5-phosphatase                                                                                                                                                                |
| <i>NCR1</i>    | 2.1 | transmembrane protein (putative)                                                                                                                                                                    |
| <i>FAS2</i>    | 2.0 | fatty acid synthase alpha subunit                                                                                                                                                                   |
| <i>PLC1</i>    | 2.0 | phosphoinositide-specific phospholipase C                                                                                                                                                           |

#### Metabolism of vitamins, cofactors, and prosthetic groups

|              |     |                                                                                                      |
|--------------|-----|------------------------------------------------------------------------------------------------------|
| <i>PYC2</i>  | 2.5 | pyruvate carboxylase                                                                                 |
| <i>SHM1</i>  | 2.0 | "Serine hydroxymethyltransferase, mitochondrial"                                                     |
| <i>BPL1</i>  | 2.2 | biotin:apoprotein ligase                                                                             |
| <i>PYC1</i>  | 2.5 | pyruvate carboxylase                                                                                 |
| <i>ECM38</i> | 2.2 | gamma-glutamyltransferase homolog                                                                    |
| <i>GCV2</i>  | 2.3 | glycine cleavage system P subunit glycine decarboxylase complex P subunit glycine synthase P subunit |
| <i>FAS2</i>  | 2.0 | fatty acid synthase alpha subunit                                                                    |

#### Secondary metabolism

|             |     |           |
|-------------|-----|-----------|
| <i>ENO1</i> | 2.1 | enolase I |
|-------------|-----|-----------|

| Gene Name    | Fold change | Gene product                                                                                                                                                                                        |
|--------------|-------------|-----------------------------------------------------------------------------------------------------------------------------------------------------------------------------------------------------|
| <i>GRE3</i>  | 2.0         | aldose reductase                                                                                                                                                                                    |
| <i>GPI13</i> | 2.0         | ER membrane localized phosphoryltransferase that adds phosphoethanolamine onto the third mannose residue of the glycosylphosphatidylinositol (GPI) anchor precursor; similar to human PIG-O protein |
| <i>ARG1</i>  | 2.0         | arginosuccinate synthetase                                                                                                                                                                          |

#### Energy

|              |     |                                                                                                            |
|--------------|-----|------------------------------------------------------------------------------------------------------------|
| <i>CDC19</i> | 2.6 | pyruvate kinase                                                                                            |
| <i>TPS1</i>  | 2.6 | trehalose-6-phosphate synthase/phosphatase complex 56 kDa synthase subunit                                 |
| <i>PYC2</i>  | 2.5 | pyruvate carboxylase                                                                                       |
| <i>GLK1</i>  | 3.0 | glucokinase                                                                                                |
| <i>NTH1</i>  | 2.3 | neutral trehalase                                                                                          |
| <i>TPS2</i>  | 2.2 | trehalose-6-phosphate phosphatase                                                                          |
| <i>PDA1</i>  | 2.2 | pyruvate dehydrogenase alpha subunit (E1 alpha)                                                            |
| <i>HXK1</i>  | 5.2 | hexokinase I (PI) (also called hexokinase A)                                                               |
| <i>PYC1</i>  | 2.5 | pyruvate carboxylase                                                                                       |
| <i>SOL4</i>  | 2.8 | 6-phosphogluconolactonase                                                                                  |
| <i>ENO1</i>  | 2.1 | enolase I                                                                                                  |
| <i>KGD1</i>  | 2.4 | alpha-ketoglutarate dehydrogenase                                                                          |
| <i>RAV1</i>  | 2.1 | Regulator of (H <sup>+</sup> )-ATPase in vacuolar membrane                                                 |
| <i>ATP2</i>  | 2.4 | F(1)F(0)-ATPase complex beta subunit                                                                       |
| <i>SDH1</i>  | 2.2 | succinate dehydrogenase flavoprotein subunit                                                               |
| <i>CSF1</i>  | 2.2 | Protein required for fermentation at low temperature                                                       |
| <i>PDC5</i>  | 2.3 | pyruvate decarboxylase                                                                                     |
| <i>GSY2</i>  | 2.2 | glycogen synthase (UDP-glucose-starch glucosyltransferase)                                                 |
| <i>FKS1</i>  | 2.6 | "1,3-beta-D-glucan synthase"                                                                               |
| <i>TSL1</i>  | 4.7 | similar to TPS3 gene product trehalose-6-phosphate synthase/phosphatase complex 123 kDa regulatory subunit |
| <i>PGM2</i>  | 4.1 | phosphoglucomutase                                                                                         |
| <i>MYO5</i>  | 2.0 | myosin I                                                                                                   |
| <i>TPS3</i>  | 3.1 | trehalose-6-phosphate synthase/phosphatase complex 115 kDa regulatory subunit                              |
| <i>LAT1</i>  | 2.5 | pyruvate dehydrogenase complex dihydrolipoamide acetyltransferase component (E2)                           |
| <i>ZWF1</i>  | 3.3 | glucose-6-phosphate dehydrogenase                                                                          |
| <i>CYT1</i>  | 2.0 | cytochrome c1                                                                                              |
| <i>LSC1</i>  | 2.0 | "alpha subunit of succinyl-CoA ligase (synthetase; ATP-forming), a mitochondrial enzyme of the TCA cycle"  |
| <i>KRE5</i>  | 2.2 | "appears to function early in (1,6)-beta-D-glucan synthesis pathway"                                       |
| <i>PYK2</i>  | 2.6 | "Pyruvate kinase, glucose-repressed isoform"                                                               |
| <i>GDH1</i>  | 2.0 | NADP-specific glutamate dehydrogenase                                                                      |
| <i>GPH1</i>  | 7.0 | glycogen phosphorylase                                                                                     |

#### Cell cycle and DNA processing

|              |     |                                                                                                                                                                                                           |
|--------------|-----|-----------------------------------------------------------------------------------------------------------------------------------------------------------------------------------------------------------|
| <i>SWH1</i>  | 2.6 | Similar to mammalian oxysterol-binding protein                                                                                                                                                            |
| <i>RPG1</i>  | 2.2 | translation initiation factor eIF3 subunit                                                                                                                                                                |
| <i>MEC1</i>  | 2.4 | "Required for mitotic growth, DNA repair and mitotic recombination, regulates phosphorylation of Rad53p, required for dmc1 arrest and meiotic recombination, homolog of fission yeast Rad3 and human ATR" |
| <i>SDS24</i> | 2.1 | "Similar to S. pombe SDS23, suppresses DIS2, localized to the nucleus"                                                                                                                                    |
| <i>BUD3</i>  | 2.2 | "Protein involved in bud-site selection and required for axial budding pattern; localizes with septins to bud neck in mitosis and may constitute ""axial landmark"" for next round of budding"            |
| <i>SSD1</i>  | 2.0 | Product of gene unknown                                                                                                                                                                                   |
| <i>TOM1</i>  | 2.0 | "hct-domain-containing protein, containing kinase motifs similar to Rsp5"                                                                                                                                 |

| <b>Gene Name</b>     | <b>Fold change</b> | <b>Gene product</b>                                                                                                                                                                                                                               |
|----------------------|--------------------|---------------------------------------------------------------------------------------------------------------------------------------------------------------------------------------------------------------------------------------------------|
| <i>SEC3</i>          | 2.0                | "Profilin synthetic lethal protein, has region of coiled-coil structure; subunit of the Exocyst complex--the Exocyst complex contains the gene products encoded by SEC3, SEC5, SEC6, SEC8, SEC10, SEC15 and EXO70 and is required for exocytosis" |
| <i>PTC2</i>          | 2.1                | protein phosphatase type 2C                                                                                                                                                                                                                       |
| <i>RSP5</i>          | 2.5                | involved in ubiquitin-mediated protein degradation                                                                                                                                                                                                |
| <i>CHD1</i>          | 2.3                | transcriptional regulator                                                                                                                                                                                                                         |
| <i>KEM1</i>          | 2.2                | 5'-3' exonuclease                                                                                                                                                                                                                                 |
| <i>SAE2</i>          | 2.2                | Involved in meiotic recombination and chromosome metabolism                                                                                                                                                                                       |
| <i>SCH9</i>          | 2.1                | cAMP-dependent protein kinase homolog suppressor of cdc25ts                                                                                                                                                                                       |
| <i>SIM1</i>          | 2.1                | (putative) involved in control of DNA replication                                                                                                                                                                                                 |
| <i>PAN1</i>          | 2.6                | Involved in actin organization and endocytosis                                                                                                                                                                                                    |
| <i>CYR1</i>          | 2.5                | adenylate cyclase                                                                                                                                                                                                                                 |
| <i>NET1</i>          | 2.0                | Nucleolar protein involved in exit from mitosis                                                                                                                                                                                                   |
| <i>SCP160</i>        | 2.2                | "May be required during cell division for faithful partitioning of the ER-nuclear envelope membranes, involved in control of mitotic chromosome transmission"                                                                                     |
| <i>JSN1</i>          | 2.1                | benomyl dependent tubulin mutant                                                                                                                                                                                                                  |
| <i>ECM38</i>         | 2.2                | gamma-glutamyltransferase homolog                                                                                                                                                                                                                 |
| <i>MSC1</i>          | 2.2                | "Protein of unknown function, green fluorescent protein (GFP)-fusion protein localizes to the endoplasmic reticulum; msc1 mutants are defective in directing meiotic recombination events to homologous chromatids"                               |
| <i>FAR11</i>         | 2.5                | "Protein involved in G1 cell cycle arrest in response to pheromone, in a pathway different from the Far1p-dependent pathway; interacts with Far3p, Far7p, Far8p, Far9p, and Far10p"                                                               |
| <i>APC1</i>          | 2.1                | ubiquitin ligase subunit                                                                                                                                                                                                                          |
| <i>ATG2</i>          | 2.1                | peripheral membrane protein                                                                                                                                                                                                                       |
| <i>BNI1</i>          | 2.0                | "formin, involved in spindle orientation"                                                                                                                                                                                                         |
| <i>NFI1</i>          | 2.0                | chromatin protein                                                                                                                                                                                                                                 |
| <i>WTM1</i>          | 2.0                | transcriptional modulator                                                                                                                                                                                                                         |
| <i>PLC1</i>          | 2.0                | phosphoinositide-specific phospholipase C                                                                                                                                                                                                         |
| <b>Transcription</b> |                    |                                                                                                                                                                                                                                                   |
| <i>SRB8</i>          | 2.7                | activation mediator subcomplex of RNA polymerase I holoenzyme                                                                                                                                                                                     |
| <i>TUP1</i>          | 2.0                | "glucose repression regulatory protein, exhibits similarity to beta subunits of G proteins"                                                                                                                                                       |
| <i>STP4</i>          | 2.3                | Involved in pre-tRNA splicing and in uptake of branched-chain amino acids                                                                                                                                                                         |
| <i>ADR1</i>          | 2.7                | positive transcriptional regulator                                                                                                                                                                                                                |
| <i>NPL3</i>          | 3.6                | contains RNA recognition motif nuclear shuttling protein                                                                                                                                                                                          |
| <i>SSN2</i>          | 2.2                | transcription factor                                                                                                                                                                                                                              |
| <i>GAL83</i>         | 2.0                | Glucose repression protein                                                                                                                                                                                                                        |
| <i>CHD1</i>          | 2.3                | transcriptional regulator                                                                                                                                                                                                                         |
| <i>PAB1</i>          | 2.5                | poly(A) binding protein                                                                                                                                                                                                                           |
| <i>ARC1</i>          | 2.0                | "Protein that binds tRNA and methionyl- and glutamyl-tRNA synthetases (Mes1p and Ygl245wp), delivering tRNA to them, stimulating catalysis, and ensuring their localization to the cytoplasm; also binds quadruplex nucleic acids"                |
| <i>KEM1</i>          | 2.2                | 5'-3' exonuclease                                                                                                                                                                                                                                 |
| <i>SOL4</i>          | 2.8                | 6-phosphogluconolactonase                                                                                                                                                                                                                         |
| <i>MGA1</i>          | 2.1                | similar to heat shock transcription factor                                                                                                                                                                                                        |
| <i>BCY1</i>          | 2.0                | cAMP-dependent protein kinase regulatory subunit                                                                                                                                                                                                  |
| <i>TAO3</i>          | 2.2                | Identified in a hunt for mutants that activate OCH1 transcription                                                                                                                                                                                 |
| <i>NET1</i>          | 2.0                | Nucleolar protein involved in exit from mitosis                                                                                                                                                                                                   |
| <i>TPK1</i>          | 2.0                | cAMP-dependent protein kinase catalytic subunit (putative)                                                                                                                                                                                        |
| <i>JSN1</i>          | 2.1                | benomyl dependent tubulin mutant                                                                                                                                                                                                                  |
| <i>GSP1</i>          | 2.1                | GTP-binding protein                                                                                                                                                                                                                               |
| <i>WTM1</i>          | 2.0                | transcriptional modulator                                                                                                                                                                                                                         |

| Gene Name                | Fold change | Gene product                                                                                                                                                                                                                       |
|--------------------------|-------------|------------------------------------------------------------------------------------------------------------------------------------------------------------------------------------------------------------------------------------|
| <b>Protein synthesis</b> |             |                                                                                                                                                                                                                                    |
| <i>RPG1</i>              | 2.2         | translation initiation factor eIF3 subunit                                                                                                                                                                                         |
| <i>EFT2</i>              | 1.9         | translation elongation factor 2 (EF-2)                                                                                                                                                                                             |
| <i>PAB1</i>              | 2.5         | poly(A) binding protein                                                                                                                                                                                                            |
| <i>FRS2</i>              | 2.0         | phenylalanine-tRNA ligase subunit                                                                                                                                                                                                  |
| <i>ARC1</i>              | 2.0         | "Protein that binds tRNA and methionyl- and glutamyl-tRNA synthetases (Mes1p and Ygl245wp), delivering tRNA to them, stimulating catalysis, and ensuring their localization to the cytoplasm; also binds quadruplex nucleic acids" |
| <i>YGR054W</i>           | 2.5         | yeast homolog of mammalian eIF2A                                                                                                                                                                                                   |
| <i>MES1</i>              | 2.3         | methionine-tRNA ligase                                                                                                                                                                                                             |
| <i>DED81</i>             | 2.2         | asparaginyl-tRNA synthetase                                                                                                                                                                                                        |
| <i>APE2</i>              | 3.4         | aminopeptidase yscII                                                                                                                                                                                                               |
| <i>EAP1</i>              | 2.3         | functionally analogous to mammalian 4E-BPs functional and limited sequence similarity to CAF20                                                                                                                                     |
| <i>DPS1</i>              | 2.7         | aspartyl-tRNA synthetase                                                                                                                                                                                                           |
| <i>EFT1</i>              | 2.1         | translation elongation factor 2 (EF-2)                                                                                                                                                                                             |
| <i>CAM1</i>              | 2.5         | calcium and phospholipid binding protein homologous to translation elongation factor 1-gamma (EF-1gamma)                                                                                                                           |
| <b>Protein fate</b>      |             |                                                                                                                                                                                                                                    |
| <i>SLA1</i>              | 2.3         | cytoskeletal protein binding protein                                                                                                                                                                                               |
| <i>MEC1</i>              | 2.4         | "Required for mitotic growth, DNA repair and mitotic recombination, regulates phosphorylation of Rad53p, required for dmc1 arrest and meiotic recombination, homolog of fission yeast Rad3 and human ATR"                          |
| <i>SSE2</i>              | 2.8         | HSP70 family SSE1 homolog                                                                                                                                                                                                          |
| <i>SDS24</i>             | 2.1         | "Similar to S. pombe SDS23, suppresses DIS2, localized to the nucleus"                                                                                                                                                             |
| <i>APE3</i>              | 2.1         | aminopeptidase yscIII                                                                                                                                                                                                              |
| <i>YCL044C</i>           | 2.4         | questionable protein                                                                                                                                                                                                               |
| <i>ABP1</i>              | 2.6         | actin binding protein                                                                                                                                                                                                              |
| <i>BPL1</i>              | 2.2         | biotin:apoprotein ligase                                                                                                                                                                                                           |
| <i>KIN1</i>              | 2.0         | Serine/threonine protein kinase                                                                                                                                                                                                    |
| <i>NPL3</i>              | 3.6         | contains RNA recognition motif nuclear shuttling protein                                                                                                                                                                           |
| <i>TOM1</i>              | 2.0         | "hect-domain-containing protein, containing kinase motifs similar to Rsp5"                                                                                                                                                         |
| <i>GDA1</i>              | 2.5         | guanosine diphosphatase of Golgi membrane                                                                                                                                                                                          |
| <i>PRB1</i>              | 2.3         | vacuolar protease B                                                                                                                                                                                                                |
| <i>GAL83</i>             | 2.0         | Glucose repression protein                                                                                                                                                                                                         |
| <i>PTC2</i>              | 2.1         | protein phosphatase type 2C                                                                                                                                                                                                        |
| <i>KAP123</i>            | 2.2         | karyopherin beta 4                                                                                                                                                                                                                 |
| <i>RSP5</i>              | 2.5         | involved in ubiquitin-mediated protein degradation                                                                                                                                                                                 |
| <i>BLM3</i>              | 2.0         | involved in protecting the cell against bleomycin damage                                                                                                                                                                           |
| <i>CHC1</i>              | 2.3         | Clathrin heavy chain                                                                                                                                                                                                               |
| <i>UBR1</i>              | 2.3         | ubiquitin-protein ligase                                                                                                                                                                                                           |
| <i>DIE2</i>              | 2.3         | glucosyltransferase                                                                                                                                                                                                                |
| <i>ECM29</i>             | 2.0         | ExtraCellular Mutant                                                                                                                                                                                                               |
| <i>KSP1</i>              | 2.6         | Serine/threonine kinase similar to casein kinase II and other serine/threonine protein kinases                                                                                                                                     |
| <i>SCH9</i>              | 2.1         | cAMP-dependent protein kinase homolog suppressor of cdc25ts                                                                                                                                                                        |
| <i>SEC24</i>             | 2.5         | vesicle coat component                                                                                                                                                                                                             |
| <i>PAN1</i>              | 2.6         | Involved in actin organization and endocytosis                                                                                                                                                                                     |
| <i>TPK1</i>              | 2.0         | cAMP-dependent protein kinase catalytic subunit (putative)                                                                                                                                                                         |
| <i>SSC1</i>              | 2.4         | mitochondrial matrix protein involved in protein import Endo.Sccl endonuclease subunit                                                                                                                                             |
| <i>PMT4</i>              | 2.0         | dolichyl phosphate-D-mannose:protein O-D-mannosyltransferase                                                                                                                                                                       |
| <i>APE2</i>              | 3.4         | aminopeptidase yscII                                                                                                                                                                                                               |
| <i>HSP104</i>            | 2.4         | heat shock protein 104                                                                                                                                                                                                             |

| Gene Name      | Fold change | Gene product                                                                                                                                                                                        |
|----------------|-------------|-----------------------------------------------------------------------------------------------------------------------------------------------------------------------------------------------------|
| <i>GPI13</i>   | 2.0         | ER membrane localized phosphoryltransferase that adds phosphoethanolamine onto the third mannose residue of the glycosylphosphatidylinositol (GPI) anchor precursor; similar to human PIG-O protein |
| <i>VPS13</i>   | 2.6         | homologous to human COH1                                                                                                                                                                            |
| <i>UBR2</i>    | 2.1         | ubiquitin-protein ligase (E3)                                                                                                                                                                       |
| <i>YPS1</i>    | 2.0         | GPI-anchored aspartic protease                                                                                                                                                                      |
| <i>ECM38</i>   | 2.2         | gamma-glutamyltransferase homolog                                                                                                                                                                   |
| <i>SEC61</i>   | 2.5         | membrane component of ER protein translocation apparatus                                                                                                                                            |
| <i>STE23</i>   | 2.0         | involved in a-factor processing                                                                                                                                                                     |
| <i>YML059C</i> | 2.1         | questionable protein                                                                                                                                                                                |
| <i>TOM40</i>   | 2.4         | forms the outer membrane import channel mitochondrial outer membrane protein                                                                                                                        |
| <i>UBP15</i>   | 2.5         | deubiquitinating enzyme (putative)                                                                                                                                                                  |
| <i>APC1</i>    | 2.1         | ubiquitin ligase subunit                                                                                                                                                                            |
| <i>ATG2</i>    | 2.1         | peripheral membrane protein                                                                                                                                                                         |
| <i>YNR047W</i> | 2.1         | questionable protein                                                                                                                                                                                |
| <i>STI1</i>    | 2.2         | heat shock protein also induced by canavanine and entry into stationary phase                                                                                                                       |
| <i>VPS17</i>   | 2.3         | Peripheral membrane protein required for vacuolar protein sorting                                                                                                                                   |
| <i>NFI1</i>    | 2.0         | chromatin protein                                                                                                                                                                                   |
| <i>KRE5</i>    | 2.2         | "appears to function early in (1,6)-beta-D-glucan synthesis pathway"                                                                                                                                |
| <i>BRO1</i>    | 2.2         | BCK1-like resistance to osmotic shock                                                                                                                                                               |
| <i>SEC16</i>   | 2.7         | vesicle coat component                                                                                                                                                                              |
| <i>SSE1</i>    | 2.2         | HSP70 family SSA1 SSE2 homolog                                                                                                                                                                      |
| <i>PEP4</i>    | 2.2         | vacuolar proteinase A                                                                                                                                                                               |
| <i>FAS2</i>    | 2.0         | fatty acid synthase alpha subunit                                                                                                                                                                   |
| <i>APM1</i>    | 2.2         | clathrin associated protein complex medium subunit                                                                                                                                                  |

#### Regulation of metabolism and protein function

|             |     |                                                                                                                                                                                                      |
|-------------|-----|------------------------------------------------------------------------------------------------------------------------------------------------------------------------------------------------------|
| <i>IRA1</i> | 2.0 | GTPase activating protein (GAP)                                                                                                                                                                      |
| <i>ILV6</i> | 2.6 | "Regulatory subunit of acetolactate synthase, which catalyzes the first step of branched-chain amino acid biosynthesis; enhances activity of the Ilv2p catalytic subunit, localizes to mitochondria" |
| <i>SEC7</i> | 2.0 | guanine nucleotide exchange protein for ARF                                                                                                                                                          |
| <i>PTC2</i> | 2.1 | protein phosphatase type 2C                                                                                                                                                                          |
| <i>BLM3</i> | 2.0 | involved in protecting the cell against bleomycin damage                                                                                                                                             |
| <i>PIL1</i> | 2.4 | Phosphorylation Inhibited by Long chain base                                                                                                                                                         |
| <i>BCY1</i> | 2.0 | cAMP-dependent protein kinase regulatory subunit                                                                                                                                                     |
| <i>SSC1</i> | 2.4 | mitochondrial matrix protein involved in protein import Endo.Sccl endonuclease subunit                                                                                                               |
| <i>TSL1</i> | 4.7 | similar to TPS3 gene product trehalose-6-phosphate synthase/phosphatase complex 123 kDa regulatory subunit                                                                                           |
| <i>IRA2</i> | 2.3 | GTPase activating protein highly homologous to Ira1p neurofibromin homolog                                                                                                                           |
| <i>STI1</i> | 2.2 | heat shock protein also induced by canavanine and entry into stationary phase                                                                                                                        |
| <i>WTM1</i> | 2.0 | transcriptional modulator                                                                                                                                                                            |

#### Cellular transport, transport facilities and transport routes

|              |     |                                                                           |
|--------------|-----|---------------------------------------------------------------------------|
| <i>SLA1</i>  | 2.3 | cytoskeletal protein binding protein                                      |
| <i>FUI1</i>  | 2.0 | uridine permease                                                          |
| <i>EDE1</i>  | 2.9 | EH domain protein involved in endocytosis                                 |
| <i>SEC18</i> | 2.1 | ATPase NSF protein involved in protein transport between ER and Golgi     |
| <i>VMA2</i>  | 2.1 | vacuolar ATPase V1 domain subunit B (60 kDa)                              |
| <i>SDS24</i> | 2.1 | "Similar to S. pombe SDS23, suppresses DIS2, localized to the nucleus"    |
| <i>GLK1</i>  | 3.0 | glucokinase                                                               |
| <i>STP4</i>  | 2.3 | Involved in pre-tRNA splicing and in uptake of branched-chain amino acids |

| <b>Gene Name</b> | <b>Fold change</b> | <b>Gene product</b>                                                                                                                                                                                                                               |
|------------------|--------------------|---------------------------------------------------------------------------------------------------------------------------------------------------------------------------------------------------------------------------------------------------|
| <i>COP1</i>      | 2.0                | coatomer complex gamma-alpha-COP alpha subunit                                                                                                                                                                                                    |
| <i>SEC7</i>      | 2.0                | guanine nucleotide exchange protein for ARF                                                                                                                                                                                                       |
| <i>RVS167</i>    | 2.0                | cytoskeletal protein (putative)                                                                                                                                                                                                                   |
| <i>PDR15</i>     | 2.0                | multidrug resistance transporter (putative)                                                                                                                                                                                                       |
| <i>NPL3</i>      | 3.6                | contains RNA recognition motif nuclear shuttling protein                                                                                                                                                                                          |
| <i>NHX1</i>      | 2.1                | Na <sup>+</sup> /H <sup>+</sup> exchanger                                                                                                                                                                                                         |
| <i>TOM1</i>      | 2.0                | "hect-domain-containing protein, containing kinase motifs similar to Rsp5"                                                                                                                                                                        |
| <i>SEC3</i>      | 2.0                | "Profilin synthetic lethal protein, has region of coiled-coil structure; subunit of the Exocyst complex--the Exocyst complex contains the gene products encoded by SEC3, SEC5, SEC6, SEC8, SEC10, SEC15 and EXO70 and is required for exocytosis" |
| <i>KAP123</i>    | 2.2                | karyopherin beta 4                                                                                                                                                                                                                                |
| <i>PAB1</i>      | 2.5                | poly(A) binding protein                                                                                                                                                                                                                           |
| <i>DNF1</i>      | 2.1                | Potential aminophospholipid translocase                                                                                                                                                                                                           |
| <i>RET2</i>      | 1.9                | coatomer (COPI) complex delta subunit                                                                                                                                                                                                             |
| <i>ARC1</i>      | 2.0                | "Protein that binds tRNA and methionyl- and glutamyl-tRNA synthetases (Mes1p and Ygl245wp), delivering tRNA to them, stimulating catalysis, and ensuring their localization to the cytoplasm; also binds quadruplex nucleic acids"                |
| <i>CHC1</i>      | 2.3                | Clathrin heavy chain                                                                                                                                                                                                                              |
| <i>NEO1</i>      | 2.1                | P-type ATPase                                                                                                                                                                                                                                     |
| <i>SEC24</i>     | 2.5                | vesicle coat component                                                                                                                                                                                                                            |
| <i>PAN1</i>      | 2.6                | Involved in actin organization and endocytosis                                                                                                                                                                                                    |
| <i>SCP160</i>    | 2.2                | "May be required during cell division for faithful partitioning of the ER-nuclear envelope membranes, involved in control of mitotic chromosome transmission"                                                                                     |
| <i>SSC1</i>      | 2.4                | mitochondrial matrix protein involved in protein import Endo.Sccl endonuclease subunit                                                                                                                                                            |
| <i>MIR1</i>      | 2.2                | Product of gene unknown                                                                                                                                                                                                                           |
| <i>ECM27</i>     | 2.3                | ExtraCellular Mutant                                                                                                                                                                                                                              |
| <i>ATP2</i>      | 2.4                | F(1)F(0)-ATPase complex beta subunit                                                                                                                                                                                                              |
| <i>SDH1</i>      | 2.2                | succinate dehydrogenase flavoprotein subunit                                                                                                                                                                                                      |
| <i>GAP1</i>      | 2.6                | general amino acid permease                                                                                                                                                                                                                       |
| <i>VPS13</i>     | 2.6                | homologous to human COH1                                                                                                                                                                                                                          |
| <i>YBT1</i>      | 2.1                | "Yeast bile transporter, similar to mammalian bile transporter"                                                                                                                                                                                   |
| <i>GSP1</i>      | 2.1                | GTP-binding protein                                                                                                                                                                                                                               |
| <i>VRP1</i>      | 2.7                | proline-rich protein verprolin                                                                                                                                                                                                                    |
| <i>SEC61</i>     | 2.5                | membrane component of ER protein translocation apparatus                                                                                                                                                                                          |
| <i>HXT2</i>      | 2.1                | high affinity hexose transporter-2                                                                                                                                                                                                                |
| <i>MYO5</i>      | 2.0                | myosin I                                                                                                                                                                                                                                          |
| <i>SSO2</i>      | 2.1                | t-SNARE                                                                                                                                                                                                                                           |
| <i>TOM40</i>     | 2.4                | forms the outer membrane import channel mitochondrial outer membrane protein                                                                                                                                                                      |
| <i>ATG2</i>      | 2.1                | peripheral membrane protein                                                                                                                                                                                                                       |
| <i>BNI1</i>      | 2.0                | "formin, involved in spindle orientation"                                                                                                                                                                                                         |
| <i>SEC21</i>     | 2.0                | PEST sequence-containing protein non-clathrin coat protein                                                                                                                                                                                        |
| <i>PHO91</i>     | 2.0                | Low-affinity phosphate transporter                                                                                                                                                                                                                |
| <i>CYT1</i>      | 2.0                | cytochrome c1                                                                                                                                                                                                                                     |
| <i>INP53</i>     | 2.0                | inositol polyphosphate 5-phosphatase                                                                                                                                                                                                              |
| <i>VPS17</i>     | 2.3                | Peripheral membrane protein required for vacuolar protein sorting                                                                                                                                                                                 |
| <i>GSP2</i>      | 2.1                | GTP-binding protein Gsp1p homolog                                                                                                                                                                                                                 |
| <i>NCR1</i>      | 2.1                | transmembrane protein (putative)                                                                                                                                                                                                                  |
| <i>SVL3</i>      | 2.1                | "Protein of unknown function, mutant phenotype suggests a potential role in vacuolar function; green fluorescent protein (GFP)-fusion protein localizes to the cell periphery, cytoplasm, bud, and bud neck"                                      |
| <i>BRO1</i>      | 2.2                | BCK1-like resistance to osmotic shock                                                                                                                                                                                                             |
| <i>SEC16</i>     | 2.7                | vesicle coat component                                                                                                                                                                                                                            |
| <i>APM1</i>      | 2.2                | clathrin associated protein complex medium subunit                                                                                                                                                                                                |



| Gene Name                                                   | Fold change | Gene product                                                                                                                                                                                                                             |
|-------------------------------------------------------------|-------------|------------------------------------------------------------------------------------------------------------------------------------------------------------------------------------------------------------------------------------------|
| <b>Cellular communication/Signal transduction mechanism</b> |             |                                                                                                                                                                                                                                          |
| <i>IRA1</i>                                                 | 2.0         | GTPase activating protein (GAP)                                                                                                                                                                                                          |
| <i>GAL83</i>                                                | 2.0         | Glucose repression protein                                                                                                                                                                                                               |
| <i>PTC2</i>                                                 | 2.1         | protein phosphatase type 2C                                                                                                                                                                                                              |
| <i>BCY1</i>                                                 | 2.0         | cAMP-dependent protein kinase regulatory subunit                                                                                                                                                                                         |
| <i>CYR1</i>                                                 | 2.5         | adenylate cyclase                                                                                                                                                                                                                        |
| <i>TPK1</i>                                                 | 2.0         | cAMP-dependent protein kinase catalytic subunit (putative)                                                                                                                                                                               |
| <i>GIS3</i>                                                 | 2.0         | GIG3 suppressor                                                                                                                                                                                                                          |
| <i>SRV2</i>                                                 | 2.4         | 70 kDa adenylyl cyclase-associated protein                                                                                                                                                                                               |
| <i>BNI1</i>                                                 | 2.0         | "formin, involved in spindle orientation"                                                                                                                                                                                                |
| <i>IRA2</i>                                                 | 2.3         | GTPase activating protein highly homologous to <i>Ira1p</i>  neurofibromin homolog                                                                                                                                                       |
| <i>INP53</i>                                                | 2.0         | inositol polyphosphate 5-phosphatase                                                                                                                                                                                                     |
| <i>BRO1</i>                                                 | 2.2         | BCK1-like resistance to osmotic shock                                                                                                                                                                                                    |
| <i>PLC1</i>                                                 | 2.0         | phosphoinositide-specific phospholipase C                                                                                                                                                                                                |
| <b>Cell rescue, defense and virulence</b>                   |             |                                                                                                                                                                                                                                          |
| <i>IST2</i>                                                 | 2.5         | "Plasma membrane protein that may be involved in osmotolerance, localizes to the mother cell in small-budded cells and to the bud in medium- and large-budded cells; mRNA is transported to the bud tip by an actomyosin-driven process" |
| <i>TPS1</i>                                                 | 2.6         | trehalose-6-phosphate synthase/phosphatase complex 56 kDa synthase subunit                                                                                                                                                               |
| <i>MEC1</i>                                                 | 2.4         | "Required for mitotic growth, DNA repair and mitotic recombination, regulates phosphorylation of Rad53p, required for <i>dmc1</i> arrest and meiotic recombination, homolog of fission yeast <i>Rad3</i> and human <i>ATR</i> "          |
| <i>SSE2</i>                                                 | 2.8         | HSP70 family  <i>SSE1</i> homolog                                                                                                                                                                                                        |
| <i>GPD1</i>                                                 | 2.1         | glycerol-3-phosphate dehydrogenase                                                                                                                                                                                                       |
| <i>NTH1</i>                                                 | 2.3         | neutral trehalase                                                                                                                                                                                                                        |
| <i>TPS2</i>                                                 | 2.2         | trehalose-6-phosphate phosphatase                                                                                                                                                                                                        |
| <i>SED1</i>                                                 | 3.5         | cell surface glycoprotein (putative)                                                                                                                                                                                                     |
| <i>SSD1</i>                                                 | 2.0         | Product of gene unknown                                                                                                                                                                                                                  |
| <i>RVS167</i>                                               | 2.0         | cytoskeletal protein (putative)                                                                                                                                                                                                          |
| <i>NHX1</i>                                                 | 2.1         | Na <sup>+</sup> /H <sup>+</sup> exchanger                                                                                                                                                                                                |
| <i>PRB1</i>                                                 | 2.3         | vacuolar protease B                                                                                                                                                                                                                      |
| <i>PTC2</i>                                                 | 2.1         | protein phosphatase type 2C                                                                                                                                                                                                              |
| <i>RSP5</i>                                                 | 2.5         | involved in ubiquitin-mediated protein degradation                                                                                                                                                                                       |
| <i>BLM3</i>                                                 | 2.0         | involved in protecting the cell against bleomycin damage                                                                                                                                                                                 |
| <i>PIL1</i>                                                 | 2.4         | Phosphorylation Inhibited by Long chain base                                                                                                                                                                                             |
| <i>MGA1</i>                                                 | 2.1         | similar to heat shock transcription factor                                                                                                                                                                                               |
| <i>GRE3</i>                                                 | 2.0         | aldose reductase                                                                                                                                                                                                                         |
| <i>SCH9</i>                                                 | 2.1         | cAMP-dependent protein kinase homolog suppressor of <i>cdc25ts</i>                                                                                                                                                                       |
| <i>BCY1</i>                                                 | 2.0         | cAMP-dependent protein kinase regulatory subunit                                                                                                                                                                                         |
| <i>SSC1</i>                                                 | 2.4         | mitochondrial matrix protein involved in protein import  <i>Endo.Sccl</i> endonuclease subunit                                                                                                                                           |
| <i>HSP104</i>                                               | 2.4         | heat shock protein 104                                                                                                                                                                                                                   |
| <i>VRP1</i>                                                 | 2.7         | proline-rich protein verprolin                                                                                                                                                                                                           |
| <i>DAK1</i>                                                 | 2.0         | dihydroxyacetone kinase (putative)                                                                                                                                                                                                       |
| <i>TSL1</i>                                                 | 4.7         | similar to <i>TPS3</i> gene product trehalose-6-phosphate synthase/phosphatase complex 123 kDa regulatory subunit                                                                                                                        |
| <i>MYO5</i>                                                 | 2.0         | myosin I                                                                                                                                                                                                                                 |
| <i>GAD1</i>                                                 | 2.2         | glutamate decarboxylase                                                                                                                                                                                                                  |
| <i>TPS3</i>                                                 | 3.1         | trehalose-6-phosphate synthase/phosphatase complex 115 kDa regulatory subunit                                                                                                                                                            |
| <i>YNL190W</i>                                              | 2.0         | questionable protein                                                                                                                                                                                                                     |
| <i>ZWF1</i>                                                 | 3.3         | glucose-6-phosphate dehydrogenase                                                                                                                                                                                                        |
| <i>BNI1</i>                                                 | 2.0         | "formin, involved in spindle orientation"                                                                                                                                                                                                |

| Gene Name   | Fold change | Gene product                                                                  |
|-------------|-------------|-------------------------------------------------------------------------------|
| <i>STI1</i> | 2.2         | heat shock protein also induced by canavanine and entry into stationary phase |
| <i>BRO1</i> | 2.2         | BCK1-like resistance to osmotic shock                                         |
| <i>SSE1</i> | 2.2         | HSP70 family SSA1 SSE2 homolog                                                |
| <i>PEP4</i> | 2.2         | vacuolar proteinase A                                                         |

#### Interaction with the environment

|                |     |                                                                                                                                                                                                                                                    |
|----------------|-----|----------------------------------------------------------------------------------------------------------------------------------------------------------------------------------------------------------------------------------------------------|
| <i>VMA2</i>    | 2.1 | vacuolar ATPase V1 domain subunit B (60 kDa)                                                                                                                                                                                                       |
| <i>IRA1</i>    | 2.0 | GTPase activating protein (GAP)                                                                                                                                                                                                                    |
| <i>GPD1</i>    | 2.1 | glycerol-3-phosphate dehydrogenase                                                                                                                                                                                                                 |
| <i>NHX1</i>    | 2.1 | Na <sup>+</sup> /H <sup>+</sup> exchanger                                                                                                                                                                                                          |
| <i>GAL83</i>   | 2.0 | Glucose repression protein                                                                                                                                                                                                                         |
| <i>PTC2</i>    | 2.1 | protein phosphatase type 2C                                                                                                                                                                                                                        |
| <i>PIL1</i>    | 2.4 | Phosphorylation Inhibited by Long chain base                                                                                                                                                                                                       |
| <i>SCH9</i>    | 2.1 | cAMP-dependent protein kinase homolog suppressor of cdc25ts                                                                                                                                                                                        |
| <i>BCY1</i>    | 2.0 | cAMP-dependent protein kinase regulatory subunit                                                                                                                                                                                                   |
| <i>CYR1</i>    | 2.5 | adenylate cyclase                                                                                                                                                                                                                                  |
| <i>PRY3</i>    | 2.6 | "Pathogen Related in Sc, contains homology to the plant PR-1 class of pathogen related proteins. The protein sequence is over 60% identical with the Pry2p & Pry3p over 145 resid. PRY1 is >35% identical (50% similar) to tobacco PR-1c protein." |
| <i>SCP160</i>  | 2.2 | "May be required during cell division for faithful partitioning of the ER-nuclear envelope membranes, involved in control of mitotic chromosome transmission"                                                                                      |
| <i>RAV1</i>    | 2.1 | Regulator of (H <sup>+</sup> )-ATPase in vacuolar membrane                                                                                                                                                                                         |
| <i>MIR1</i>    | 2.2 | Product of gene unknown                                                                                                                                                                                                                            |
| <i>ATP2</i>    | 2.4 | F(1)F(0)-ATPase complex beta subunit                                                                                                                                                                                                               |
| <i>GFA1</i>    | 3.2 | glucoseamine-6-phosphate synthase glutamine_fructose-6-phosphate amidotransferase                                                                                                                                                                  |
| <i>STE23</i>   | 2.0 | involved in a-factor processing                                                                                                                                                                                                                    |
| <i>MYO5</i>    | 2.0 | myosin I                                                                                                                                                                                                                                           |
| <i>FAR11</i>   | 2.5 | "Protein involved in G1 cell cycle arrest in response to pheromone, in a pathway different from the Far1p-dependent pathway; interacts with Far3p, Far7p, Far8p, Far9p, and Far10p"                                                                |
| <i>BNI1</i>    | 2.0 | "formin, involved in spindle orientation"                                                                                                                                                                                                          |
| <i>PHO91</i>   | 2.0 | Low-affinity phosphate transporter                                                                                                                                                                                                                 |
| <i>YNR047W</i> | 2.1 | questionable protein                                                                                                                                                                                                                               |
| <i>BRO1</i>    | 2.2 | BCK1-like resistance to osmotic shock                                                                                                                                                                                                              |
| <i>SSE1</i>    | 2.2 | HSP70 family SSA1 SSE2 homolog                                                                                                                                                                                                                     |

#### Transposable elements, viral and plasmid proteins

|                  |     |                                                                                                                                    |
|------------------|-----|------------------------------------------------------------------------------------------------------------------------------------|
| <i>YDR170W-A</i> | 2.4 | Ty ORF                                                                                                                             |
| <i>YDR210W-A</i> | 2.9 | TyA Gag protein; the main structural constituent of virus-like particles (VLPs)                                                    |
| <i>YDR261W-A</i> | 2.4 | TyA Gag protein; the main structural constituent of virus-like particles (VLPs)                                                    |
| <i>YGR161W-A</i> | 2.1 | TyA Gag protein; the main structural constituent of virus-like particles (VLPs)                                                    |
| <i>YLR410W-A</i> | 2.8 | TyA Gag protein; the main structural constituent of virus-like particles (VLPs)                                                    |
| <i>YOR192C-A</i> | 2.8 | TyA Gag protein; the main structural constituent of virus-like particles (VLPs)                                                    |
| <i>YOR343W-A</i> | 3.0 | TyA Gag protein; the main structural constituent of virus-like particles (VLPs)                                                    |
| <i>YOR343W-B</i> | 3.3 | "TyB Gag-Pol protein; proteolytically processed to make the Gag, RT, PR, and IN proteins that are required for retrotransposition" |

#### Cell fate

|             |     |                                             |
|-------------|-----|---------------------------------------------|
| <i>SLA1</i> | 2.3 | cytoskeletal protein binding protein        |
| <i>ABP1</i> | 2.6 | actin binding protein                       |
| <i>WHI4</i> | 2.2 | RNA binding protein (putative) WHI3 homolog |

| Gene Name     | Fold change | Gene product                                                                                                                                                                                                 |
|---------------|-------------|--------------------------------------------------------------------------------------------------------------------------------------------------------------------------------------------------------------|
| <i>SSD1</i>   | 2.0         | Product of gene unknown                                                                                                                                                                                      |
| <i>RVS167</i> | 2.0         | cytoskeletal protein (putative)                                                                                                                                                                              |
| <i>SCH9</i>   | 2.1         | cAMP-dependent protein kinase homolog suppressor of <i>cdc25ts</i>                                                                                                                                           |
| <i>BCY1</i>   | 2.0         | cAMP-dependent protein kinase regulatory subunit                                                                                                                                                             |
| <i>SIM1</i>   | 2.1         | (putative) involved in control of DNA replication                                                                                                                                                            |
| <i>TAO3</i>   | 2.2         | Identified in a hunt for mutants that activate <i>OCH1</i> transcription                                                                                                                                     |
| <i>ATP2</i>   | 2.4         | F(1)F(0)-ATPase complex beta subunit                                                                                                                                                                         |
| <i>VRP1</i>   | 2.7         | proline-rich protein verprolin                                                                                                                                                                               |
| <i>SSO2</i>   | 2.1         | t-SNARE                                                                                                                                                                                                      |
| <i>SRV2</i>   | 2.4         | 70 kDa adenylyl cyclase-associated protein                                                                                                                                                                   |
| <i>WHI3</i>   | 2.0         | RNA binding protein (putative)                                                                                                                                                                               |
| <i>BNI1</i>   | 2.0         | "formin, involved in spindle orientation"                                                                                                                                                                    |
| <i>STI1</i>   | 2.2         | heat shock protein also induced by canavanine and entry into stationary phase                                                                                                                                |
| <i>NFI1</i>   | 2.0         | chromatin protein                                                                                                                                                                                            |
| <i>KRE5</i>   | 2.2         | "appears to function early in (1,6)-beta-D-glucan synthesis pathway"                                                                                                                                         |
| <i>SVL3</i>   | 2.1         | "Protein of unknown function, mutant phenotype suggests a potential role in vacuolar function; green fluorescent protein (GFP)-fusion protein localizes to the cell periphery, cytoplasm, bud, and bud neck" |
| <i>SSE1</i>   | 2.2         | HSP70 family SSA1 SSE2 homolog                                                                                                                                                                               |
| <i>PLC1</i>   | 2.0         | phosphoinositide-specific phospholipase C                                                                                                                                                                    |

#### Biogenesis of cellular components

|                |     |                                                                                                             |
|----------------|-----|-------------------------------------------------------------------------------------------------------------|
| <i>SLA1</i>    | 2.3 | cytoskeletal protein binding protein                                                                        |
| <i>YCL044C</i> | 2.4 | questionable protein                                                                                        |
| <i>ABP1</i>    | 2.6 | actin binding protein                                                                                       |
| <i>SED1</i>    | 3.5 | cell surface glycoprotein (putative)                                                                        |
| <i>ADR1</i>    | 2.7 | positive transcriptional regulator                                                                          |
| <i>SSD1</i>    | 2.0 | Product of gene unknown                                                                                     |
| <i>RVS167</i>  | 2.0 | cytoskeletal protein (putative)                                                                             |
| <i>TOM1</i>    | 2.0 | "hect-domain-containing protein, containing kinase motifs similar to Rsp5"                                  |
| <i>CWH41</i>   | 2.1 | glucosidase I                                                                                               |
| <i>ECM29</i>   | 2.0 | ExtraCellular Mutant                                                                                        |
| <i>BCY1</i>    | 2.0 | cAMP-dependent protein kinase regulatory subunit                                                            |
| <i>SIM1</i>    | 2.1 | (putative) involved in control of DNA replication                                                           |
| <i>PAN1</i>    | 2.6 | Involved in actin organization and endocytosis                                                              |
| <i>BBC1</i>    | 2.8 | shows synthetic fitness defect with <i>bni1</i> mutants and associates with the Bee1p-Vrp1p-Myo3/5p complex |
| <i>MHP1</i>    | 2.5 | microtubule-associated protein (MAP) (putative)                                                             |
| <i>NET1</i>    | 2.0 | Nucleolar protein involved in exit from mitosis                                                             |
| <i>ECM27</i>   | 2.3 | ExtraCellular Mutant                                                                                        |
| <i>CWP1</i>    | 3.4 | cell wall mannoprotein                                                                                      |
| <i>GFA1</i>    | 3.2 | glucoseamine-6-phosphate synthase glutamine_ fructose-6-phosphate amidotransferase                          |
| <i>SDH1</i>    | 2.2 | succinate dehydrogenase flavoprotein subunit                                                                |
| <i>ECM4</i>    | 2.4 | ExtraCellular Mutant                                                                                        |
| <i>MMM1</i>    | 2.4 | mitochondrial outer membrane protein                                                                        |
| <i>GSP1</i>    | 2.1 | GTP-binding protein                                                                                         |
| <i>ECM38</i>   | 2.2 | gamma-glutamyltransferase homolog                                                                           |
| <i>VRP1</i>    | 2.7 | proline-rich protein verprolin                                                                              |
| <i>FKS1</i>    | 2.6 | "1,3-beta-D-glucan synthase"                                                                                |
| <i>MYO5</i>    | 2.0 | myosin I                                                                                                    |
| <i>SSO2</i>    | 2.1 | t-SNARE                                                                                                     |
| <i>SRV2</i>    | 2.4 | 70 kDa adenylyl cyclase-associated protein                                                                  |
| <i>ATG2</i>    | 2.1 | peripheral membrane protein                                                                                 |
| <i>BNI1</i>    | 2.0 | "formin, involved in spindle orientation"                                                                   |
| <i>YOL155C</i> | 2.1 | ORF                                                                                                         |

| Gene Name    | Fold change | Gene product                                                                                                                                                                                                 |
|--------------|-------------|--------------------------------------------------------------------------------------------------------------------------------------------------------------------------------------------------------------|
| <i>DFG16</i> | 2.1         | "Probable multiple transmembrane protein, involved in invasive growth upon nitrogen starvation"                                                                                                              |
| <i>INP53</i> | 2.0         | inositol polyphosphate 5-phosphatase                                                                                                                                                                         |
| <i>NFI1</i>  | 2.0         | chromatin protein                                                                                                                                                                                            |
| <i>GSP2</i>  | 2.1         | GTP-binding protein Gsp1p homolog                                                                                                                                                                            |
| <i>SVL3</i>  | 2.1         | "Protein of unknown function, mutant phenotype suggests a potential role in vacuolar function; green fluorescent protein (GFP)-fusion protein localizes to the cell periphery, cytoplasm, bud, and bud neck" |
| <i>APM1</i>  | 2.2         | clathrin associated protein complex medium subunit                                                                                                                                                           |
| <i>PLC1</i>  | 2.0         | phosphoinositide-specific phospholipase C                                                                                                                                                                    |

#### Cell type differentiation

|               |     |                                                                                                                                                                                                                                                   |
|---------------|-----|---------------------------------------------------------------------------------------------------------------------------------------------------------------------------------------------------------------------------------------------------|
| <i>SLA1</i>   | 2.3 | cytoskeletal protein binding protein                                                                                                                                                                                                              |
| <i>IRA1</i>   | 2.0 | GTPase activating protein (GAP)                                                                                                                                                                                                                   |
| <i>BUD3</i>   | 2.2 | "Protein involved in bud-site selection and required for axial budding pattern; localizes with septins to bud neck in mitosis and may constitute ""axial landmark"" for next round of budding"                                                    |
| <i>ABP1</i>   | 2.6 | actin binding protein                                                                                                                                                                                                                             |
| <i>SPO71</i>  | 2.0 | "Meiosis-specific protein of unknown function, required for spore wall formation during sporulation; dispensible for both nuclear divisions during meiosis"                                                                                       |
| <i>SSD1</i>   | 2.0 | Product of gene unknown                                                                                                                                                                                                                           |
| <i>RVS167</i> | 2.0 | cytoskeletal protein (putative)                                                                                                                                                                                                                   |
| <i>EMI2</i>   | 2.7 | Early Meiotic Induction                                                                                                                                                                                                                           |
| <i>PRB1</i>   | 2.3 | vacuolar protease B                                                                                                                                                                                                                               |
| <i>SEC3</i>   | 2.0 | "Profilin synthetic lethal protein, has region of coiled-coil structure; subunit of the Exocyst complex--the Exocyst complex contains the gene products encoded by SEC3, SEC5, SEC6, SEC8, SEC10, SEC15 and EXO70 and is required for exocytosis" |
| <i>GAL83</i>  | 2.0 | Glucose repression protein                                                                                                                                                                                                                        |
| <i>RSP5</i>   | 2.5 | involved in ubiquitin-mediated protein degradation                                                                                                                                                                                                |
| <i>KEM1</i>   | 2.2 | 5'-3' exonuclease                                                                                                                                                                                                                                 |
| <i>MGA1</i>   | 2.1 | similar to heat shock transcription factor                                                                                                                                                                                                        |
| <i>BCY1</i>   | 2.0 | cAMP-dependent protein kinase regulatory subunit                                                                                                                                                                                                  |
| <i>TAO3</i>   | 2.2 | Identified in a hunt for mutants that activate OCH1 transcription                                                                                                                                                                                 |
| <i>PAN1</i>   | 2.6 | Involved in actin organization and endocytosis                                                                                                                                                                                                    |
| <i>CYR1</i>   | 2.5 | adenylate cyclase                                                                                                                                                                                                                                 |
| <i>TPK1</i>   | 2.0 | cAMP-dependent protein kinase catalytic subunit (putative)                                                                                                                                                                                        |
| <i>VRP1</i>   | 2.7 | proline-rich protein verprolin                                                                                                                                                                                                                    |
| <i>MYO5</i>   | 2.0 | myosin I                                                                                                                                                                                                                                          |
| <i>SSO2</i>   | 2.1 | t-SNARE                                                                                                                                                                                                                                           |
| <i>SRV2</i>   | 2.4 | 70 kDa adenylyl cyclase-associated protein                                                                                                                                                                                                        |
| <i>WHI3</i>   | 2.0 | RNA binding protein (putative)                                                                                                                                                                                                                    |
| <i>ATG2</i>   | 2.1 | peripheral membrane protein                                                                                                                                                                                                                       |
| <i>BNI1</i>   | 2.0 | "formin, involved in spindle orientation"                                                                                                                                                                                                         |
| <i>DFG16</i>  | 2.1 | "Probable multiple transmembrane protein, involved in invasive growth upon nitrogen starvation"                                                                                                                                                   |
| <i>NFI1</i>   | 2.0 | chromatin protein                                                                                                                                                                                                                                 |
| <i>SVL3</i>   | 2.1 | "Protein of unknown function, mutant phenotype suggests a potential role in vacuolar function; green fluorescent protein (GFP)-fusion protein localizes to the cell periphery, cytoplasm, bud, and bud neck"                                      |
| <i>PEP4</i>   | 2.2 | vacuolar proteinase A                                                                                                                                                                                                                             |
| <i>PLC1</i>   | 2.0 | phosphoinositide-specific phospholipase C                                                                                                                                                                                                         |

#### Unclassified proteins

|                |     |                                                                                                                              |
|----------------|-----|------------------------------------------------------------------------------------------------------------------------------|
| <i>YAL053W</i> | 2.2 | Protein of unknown function; green fluorescent protein (GFP)-fusion protein localizes to the cytoplasm in a punctate pattern |
| <i>YBR108W</i> | 2.3 | questionable protein                                                                                                         |
| <i>YCL045C</i> | 2.1 | questionable protein                                                                                                         |

| <b>Gene Name</b> | <b>Fold change</b> | <b>Gene product</b>                                                                                                                                                                                             |
|------------------|--------------------|-----------------------------------------------------------------------------------------------------------------------------------------------------------------------------------------------------------------|
| <i>SYP1</i>      | 2.1                | Suppressor of Yeast Profilin deletion                                                                                                                                                                           |
| <i>YCR061W</i>   | 2.7                | Protein of unknown function; green fluorescent protein (GFP)-fusion protein localizes to the cytoplasm in a punctate pattern                                                                                    |
| <i>YEL043W</i>   | 2.3                | questionable protein                                                                                                                                                                                            |
| <i>ZRG8</i>      | 2.5                | Zinc regulated gene                                                                                                                                                                                             |
| <i>SCY1</i>      | 2.0                | Suppressor of GTPase mutant                                                                                                                                                                                     |
| <i>YHR087W</i>   | 3.8                | questionable protein                                                                                                                                                                                            |
| <i>YHR214W-A</i> | 2.0                | questionable protein                                                                                                                                                                                            |
| <i>YIL169C</i>   | 2.4                | questionable protein                                                                                                                                                                                            |
| <i>YKR018C</i>   | 2.3                | questionable protein                                                                                                                                                                                            |
| <i>YLR162W</i>   | 2.1                | questionable protein                                                                                                                                                                                            |
| <i>YLR187W</i>   | 2.1                | "Protein of unknown function; green fluorescent protein (GFP)-fusion protein localizes to the cell periphery, cytoplasm, bud, and bud neck"                                                                     |
| <i>YML072C</i>   | 2.1                | Protein of unknown function; green fluorescent protein (GFP)-fusion protein localizes to the cell periphery                                                                                                     |
| <i>YMR086W</i>   | 2.2                | Protein of unknown function; green fluorescent protein (GFP)-fusion protein localizes to the cell periphery                                                                                                     |
| <i>YMR196W</i>   | 2.2                | questionable protein                                                                                                                                                                                            |
| <i>YMR247C</i>   | 2.1                | questionable protein                                                                                                                                                                                            |
| <i>YNL321W</i>   | 2.1                | not essential for vegetative growth                                                                                                                                                                             |
| <i>CUE5</i>      | 2.0                | "Protein containing a CUE domain that binds ubiquitin, which may facilitate intramolecular monoubiquitination; green fluorescent protein (GFP)-fusion protein localizes to the cytoplasm in a punctate pattern" |
| <i>YOR066W</i>   | 2.0                | questionable protein                                                                                                                                                                                            |
| <i>YPL137C</i>   | 2.1                | questionable protein                                                                                                                                                                                            |
| <i>YPL184C</i>   | 2.1                | questionable protein                                                                                                                                                                                            |
