# Supplementary material for: Quercetin Protects Saccharomyces cerevisiae against Oxidative Stress by Inducing Trehalose Biosynthesis and the Cell Wall Integrity Pathway
Source: PubMed Central journal article supplement (PMC3445532; doi:10.1371/journal.pone.0045494), 2012-09-18
Supplement: pone.0045494.s002.pdf [file pone.0045494.s002.pdf]

**Table S2 Genes down regulated in quercetin treated cells.** *S. cerevisiae* BY4741 was grown to exponential phase in YPD medium and treated with 300  $\mu$ M of quercetin or equal volume of DMSO (control cells) for 15 min. Genes differentially regulated (quercetin vs control) were sorted into functional categories according to MIPS; some genes were listed in more than one category.

| Gene name                                          | Fold change | Gene Product                                                                           |
|----------------------------------------------------|-------------|----------------------------------------------------------------------------------------|
| <b>Amino acid metabolism</b>                       |             |                                                                                        |
| <i>SRB6</i>                                        | -2.1        | part of Srb/mediator complex; transcription factor                                     |
| <i>CIT2</i>                                        | -1.0        | citrate synthase                                                                       |
| <i>MAK31</i>                                       | -1.8        | member of the Sm protein family                                                        |
| <i>DTD1</i>                                        | -1.2        | D-Tyr-tRNA(Tyr) deacylase                                                              |
| <i>LYS5</i>                                        | -1.0        | alpha aminoadipate reductase phosphopantetheinyl transferase                           |
| <i>YIL167W</i>                                     | -1.3        | questionable protein                                                                   |
| <i>MET14</i>                                       | -1.1        | adenylylsulfate kinase                                                                 |
| <i>MET1</i>                                        | -1.1        | S-adenosyl-L-methionine uroporphyrinogen III transmethylase                            |
| <i>ASP3-1</i>                                      | -1.2        | nitrogen catabolite-regulated cell-wall L-asparaginase II                              |
| <i>ASP3-2</i>                                      | -1.0        | nitrogen catabolite-regulated cell-wall L-asparaginase II                              |
| <i>ASP3-3</i>                                      | -1.0        | nitrogen catabolite-regulated cell-wall L-asparaginase II                              |
| <i>ASP3-4</i>                                      | -1.2        | nitrogen catabolite-regulated cell-wall L-asparaginase II                              |
| <i>ORT1</i>                                        | -1.0        | ornithine transporter of the mitochondrial inner membrane                              |
| <i>MET31</i>                                       | -1.2        | highly homologous to Met32p; transcriptional regulator of sulfur amino acid metabolism |
| <b>Nucleotide/nucleoside/nucleobase metabolism</b> |             |                                                                                        |
| <i>RIB1</i>                                        | -0.9        | GTP cyclohydrolase II                                                                  |
| <i>DUT1</i>                                        | -1.2        | dUTP pyrophosphatase                                                                   |
| <i>CDC36</i>                                       | -1.1        | basal transcription inhibitor; transcriptional regulator                               |
| <i>HPT1</i>                                        | -1.8        | hypoxanthine guanine phosphoribosyltransferase                                         |
| <i>GNA1</i>                                        | -1.2        | glucosamine-phosphate N-acetyltransferase                                              |
| <i>SLX9</i>                                        | -0.9        | protein of unknown function                                                            |
| <i>RRP46</i>                                       | -1.2        | 3'->5' exoribonuclease                                                                 |
| <i>CPD1</i>                                        | -1.9        | 2',3'-cyclic nucleotide 3'-phosphodiesterase                                           |
| <i>DAL7</i>                                        | -1.5        | malate synthase 2                                                                      |
| <i>MRT4</i>                                        | -1.3        | mRNA turnover 4                                                                        |
| <i>PUS5</i>                                        | -1.8        | RNA:pseudouridine (Psi)-synthase                                                       |
| <i>URA10</i>                                       | -0.9        | orotate phosphoribosyltransferase 2                                                    |
| <i>LSM7</i>                                        | -1.6        | snRNP protein                                                                          |
| <i>DCP1</i>                                        | -0.9        | mRNA decapping enzyme                                                                  |
| <i>SPS4</i>                                        | -1.6        | sporulation-specific protein                                                           |
| <i>FCY1</i>                                        | -1.2        | cytosine deaminase                                                                     |
| <b>Phosphate metabolism</b>                        |             |                                                                                        |
| <i>DUT1</i>                                        | -1.2        | dUTP pyrophosphatase                                                                   |
| <i>YPI1</i>                                        | -1.0        | PP1 phosphatase inhibitor                                                              |
| <i>DOG2</i>                                        | -0.9        | 2-deoxyglucose-6-phosphate phosphatase                                                 |
| <i>MET14</i>                                       | -1.1        | adenylylsulfate kinase                                                                 |
| <i>FBP1</i>                                        | -0.9        | fructose-1,6-bisphosphatase                                                            |
| <i>CTL1</i>                                        | -1.3        | RNA triphosphatase                                                                     |
| <b>Regulation of phosphate metabolism</b>          |             |                                                                                        |
| <i>YPI1</i>                                        | -1.0        | PP1 phosphatase inhibitor                                                              |
| <b>C-compound and carbohydrate metabolism</b>      |             |                                                                                        |
| <i>ACS1</i>                                        | -1.5        | acetyl CoA synthetase                                                                  |
| <i>LDB7</i>                                        | -0.9        | protein involved in mannosylphosphorylation of cell wall mannoproteins                 |

| <b>Gene name</b> | <b>Fold change</b> | <b>Gene Product</b>                                                                                        |
|------------------|--------------------|------------------------------------------------------------------------------------------------------------|
| <i>HAP3</i>      | -1.3               | transcriptional activator protein of CYC1 (component of HAP2/HAP3 heteromer)                               |
| <i>GAL10</i>     | -1.2               | UDP-glucose 4-epimerase                                                                                    |
| <i>SRB6</i>      | -2.1               | part of Srb/Mediator complex; transcription factor                                                         |
| <i>CIT2</i>      | -1.0               | citrate synthase                                                                                           |
| <i>OST4</i>      | -0.9               | oligosaccharyltransferase subunit                                                                          |
| <i>SOR2</i>      | -1.3               | protein of unknown function, possible role in fructose or mannose metabolism                               |
| <i>NRG1</i>      | -1.6               | binds to UAS-1 in the STA1 promoter and can interact with Ssn6; transcriptional repressor                  |
| <i>SNF11</i>     | -1.4               | SWI/SNF global transcription activator complex component                                                   |
| <i>YDR248C</i>   | -1.2               | questionable protein                                                                                       |
| <i>GPI11</i>     | -1.3               | protein involved in glycosylphosphatidylinositol (GPI) biosynthesis                                        |
| <i>ACN9</i>      | -1.2               | Protein of the mitochondrial intermembrane space, required for acetate utilization and gluconeogenesis     |
| <i>FAU1</i>      | -1.1               | 5,10-methenyltetrahydrofolate synthetase                                                                   |
| <i>GNA1</i>      | -1.2               | glucosamine-phosphate N-acetyltransferase                                                                  |
| <i>SNF6</i>      | -0.9               | chromatin remodeling Snf/Swi complex subunit                                                               |
| <i>DOG2</i>      | -0.9               | 2-deoxyglucose-6-phosphate phosphatase                                                                     |
| <i>DAL7</i>      | -1.5               | malate synthase 2                                                                                          |
| <i>GON7</i>      | -1.4               | protein proposed to be involved in the transfer of mannosylphosphate groups onto N-linked oligosaccharides |
| <i>SOR1</i>      | -1.5               | sorbitol dehydrogenase, sorbitol-induced                                                                   |
| <i>KTI12</i>     | -1.1               | elongator associated protein                                                                               |
| <i>YLR164W</i>   | -1.1               | strong similarity to succinate dehydrogenase membrane anchor subunit Sdh4p                                 |
| <i>IDP3</i>      | -1.0               | NADP-dependent isocitrate dehydrogenase                                                                    |
| <i>YNR071C</i>   | -1.3               | questionable protein                                                                                       |
| <i>RKI1</i>      | -0.9               | ribose-5-phosphate ketol-isomerase                                                                         |
| <i>OST2</i>      | -1.4               | oligosaccharyltransferase epsilon subunit                                                                  |
| <i>SPR1</i>      | -1.1               | exo-1,3-beta-glucanase, sporulation-specific                                                               |
| <i>YOR283W</i>   | -0.9               | questionable protein                                                                                       |

#### **Lipid, fatty acid and isoprenoid metabolism**

|                |      |                                                                     |
|----------------|------|---------------------------------------------------------------------|
| <i>RER2</i>    | -0.9 | cis-prenyltransferase                                               |
| <i>GPI11</i>   | -1.3 | protein involved in glycosylphosphatidylinositol (GPI) biosynthesis |
| <i>YLL049W</i> | -0.9 | questionable protein                                                |
| <i>ARV1</i>    | -1.0 | protein involved in sterol distribution                             |
| <i>IDP3</i>    | -1.0 | NADP-dependent isocitrate dehydrogenase                             |
| <i>SPO1</i>    | -0.9 | similar to phospholipase B                                          |
| <i>GPI15</i>   | -1.6 | human Pig-H homolog                                                 |
| <i>CYB5</i>    | -1.1 | cytochrome b5                                                       |
| <i>YOL101C</i> | -0.9 | questionable protein                                                |
| <i>INO4</i>    | -1.7 | basic helix-loop-helix (bHLH) protein                               |
| <i>YPL095C</i> | -1.0 | questionable protein                                                |
| <i>PPT2</i>    | -2.1 | phosphopantetheine:protein transferase (PPTase)                     |
| <i>DAP1</i>    | -1.5 | sterol-binding protein (putative)                                   |

#### **Metabolism of vitamins, cofactors, and prosthetic groups**

|              |      |                                                                                   |
|--------------|------|-----------------------------------------------------------------------------------|
| <i>ACS1</i>  | -1.5 | acetyl CoA synthetase                                                             |
| <i>RIB1</i>  | -0.9 | GTP cyclohydrolase II                                                             |
| <i>PET18</i> | -2.2 | protein required for respiratory growth and stability of the mitochondrial genome |
| <i>HEM3</i>  | -0.9 | phorphobilinogen deaminase (uroporphyrinogen synthase)                            |
| <i>FAU1</i>  | -1.1 | 5,10-methenyltetrahydrofolate synthetase                                          |
| <i>SNO3</i>  | -0.9 | protein is related with B(1) biosynthesis during the exponential phase            |

| Gene name   | Fold change | Gene Product                                                         |
|-------------|-------------|----------------------------------------------------------------------|
| <i>LYS5</i> | -1.0        | alpha amino adipate reductase phosphopantetheinyl transferase        |
| <i>QCR9</i> | -1.0        | ubiquinol cytochrome c oxidoreductase complex 7.3 kDa subunit 9      |
| <i>FMC1</i> | -1.2        | assembly factor of ATP synthase in heat stress                       |
| <i>MET1</i> | -1.1        | S-adenosyl-L-methionine uroporphyrinogen III transmethylase          |
| <i>IDP3</i> | -1.0        | NADP-dependent isocitrate dehydrogenase                              |
| <i>BIO3</i> | -1.0        | 7,8-diamino-pelargonic acid aminotransferase (DAPA) aminotransferase |
| <i>ISU1</i> | -1.1        | iron-sulfur cluster nifU-like protein                                |
| <i>PPT2</i> | -2.1        | phosphopantetheine:protein transferase (PPTase)                      |

#### Secondary metabolism

|                |      |                                                             |
|----------------|------|-------------------------------------------------------------|
| <i>KTI11</i>   | -1.2 | similar to Hemiascomycetous yeast protein                   |
| <i>MAK31</i>   | -1.8 | member of the Sm protein family                             |
| <i>HEM3</i>    | -0.9 | phorphobilinogen deaminase (uroporphyrinogen synthase)      |
| <i>TSA2</i>    | -1.0 | thioredoxin-peroxidase                                      |
| <i>YJR097W</i> | -1.5 | protein that may function as a cochaperone                  |
| <i>MET1</i>    | -1.1 | S-adenosyl-L-methionine uroporphyrinogen III transmethylase |

#### Energy

|                |      |                                                                                                        |
|----------------|------|--------------------------------------------------------------------------------------------------------|
| <i>ACS1</i>    | -1.5 | acetyl CoA synthetase                                                                                  |
| <i>NRG2</i>    | -1.6 | NRG1 homolog                                                                                           |
| <i>CIT2</i>    | -1.0 | citrate synthase                                                                                       |
| <i>COX9</i>    | -2.0 | cytochrome c oxidase subunit VIIa                                                                      |
| <i>INH1</i>    | -1.4 | ATPase inhibitor                                                                                       |
| <i>PET100</i>  | -1.5 | cytochrome c oxidase-specific assembly factor                                                          |
| <i>YDR115W</i> | -1.4 | questionable protein                                                                                   |
| <i>TIM11</i>   | -1.7 | mitochondrial F1F0-ATPase subunit e                                                                    |
| <i>ACN9</i>    | -1.2 | Protein of the mitochondrial intermembrane space, required for acetate utilization and gluconeogenesis |
| <i>QCR7</i>    | -1.1 | ubiquinol cytochrome C oxidoreductase subunit 7                                                        |
| <i>UBC8</i>    | -1.0 | ubiquitin-conjugating enzyme; ubiquitin-protein ligase                                                 |
| <i>YPI1</i>    | -1.0 | PP1 phosphatase inhibitor                                                                              |
| <i>QCR6</i>    | -1.3 | ubiquinol cytochrome C oxidoreductase subunit 6 (17 kDa)                                               |
| <i>YGL226W</i> | -1.0 | questionable protein                                                                                   |
| <i>QCR9</i>    | -1.0 | ubiquinol cytochrome c oxidoreductase complex 7.3 kDa subunit 9                                        |
| <i>VMA10</i>   | -1.2 | vacuolar ATPase V1 domain subunit G (13 kDa)                                                           |
| <i>VMA22</i>   | -1.9 | required for V-ATPase activity                                                                         |
| <i>DAL7</i>    | -1.5 | malate synthase 2                                                                                      |
| <i>CYC1</i>    | -0.9 | iso-1-cytochrome c                                                                                     |
| <i>COX17</i>   | -1.5 | cysteine-rich protein                                                                                  |
| <i>COX12</i>   | -1.1 | cytochrome c oxidase subunit VIb                                                                       |
| <i>YLR164W</i> | -1.1 | strong similarity to succinate dehydrogenase membrane anchor subunit Sdh4p                             |
| <i>FBP1</i>    | -0.9 | fructose-1,6-bisphosphatase                                                                            |
| <i>COX8</i>    | -1.0 | cytochrome c oxidase chain VIII                                                                        |
| <i>ATP18</i>   | -1.7 | ATP synthase associated protein                                                                        |
| <i>YML087C</i> | -1.1 | questionable protein                                                                                   |
| <i>COX14</i>   | -1.2 | mitochondrial membrane protein                                                                         |
| <i>MRPS17</i>  | -0.9 | mitochondrial ribosomal protein of the small subunit                                                   |
| <i>COX7</i>    | -2.2 | cytochrome c oxidase subunit VII                                                                       |
| <i>YMR299C</i> | -1.3 | protein of unknown function; GFP-fusion protein localizes to the cytoplasm                             |
| <i>IDP3</i>    | -1.0 | NADP-dependent isocitrate dehydrogenase                                                                |
| <i>ATP19</i>   | -1.2 | ATP synthase subunit k homolog                                                                         |
| <i>RKI1</i>    | -0.9 | ribose-5-phosphate ketol-isomerase                                                                     |
| <i>YOR283W</i> | -0.9 | questionable protein                                                                                   |
| <i>OYE3</i>    | -1.8 | NADPH dehydrogenase                                                                                    |
| <i>ATP15</i>   | -1.3 | ATP synthase epsilon subunit                                                                           |
| <i>ATP20</i>   | -1.5 | ATP synthase subunit g homolog                                                                         |

| Gene name                            | Fold change | Gene Product                                                                                                               |
|--------------------------------------|-------------|----------------------------------------------------------------------------------------------------------------------------|
| <i>MRPL51</i>                        | -1.1        | mitochondrial ribosomal protein of the large subunit                                                                       |
| <b>Cell cycle and DNA processing</b> |             |                                                                                                                            |
| <i>POP5</i>                          | -1.3        | RNase MRP subunit (putative); RNase P integral subunit                                                                     |
| <i>HTA2</i>                          | -1.7        | histone H2A                                                                                                                |
| <i>KTI11</i>                         | -1.2        | similar to Hemiascomycetous yeast protein                                                                                  |
| <i>HHF1</i>                          | -2.3        | histone H4 (HHF1 and HHF2 code for identical proteins)                                                                     |
| <i>HHT1</i>                          | -1.7        | histone H3 (HHT1 and HHT2 code for identical proteins)                                                                     |
| <i>POL30</i>                         | -1.1        | proliferating Cell Nuclear Antigen (PCNA)                                                                                  |
| <i>NHP6B</i>                         | -1.2        | 11 kDa nonhistone chromosomal protein                                                                                      |
| <i>SLX1</i>                          | -1.3        | subunit of a complex, with Slx4p, that hydrolyzes 5' branches from duplex DNA                                              |
| <i>DAD3</i>                          | -1.3        | outer kinetochore protein - part of Dam1 complex                                                                           |
| <i>DPB3</i>                          | -1.1        | DNA polymerase II C and C' subunits                                                                                        |
| <i>HMLALPHA2</i>                     | -2.7        | mating type regulatory protein, silenced copy at HML                                                                       |
| <i>HTL1</i>                          | -2.5        | high-temperature lethal                                                                                                    |
| <i>MATALPHA2</i>                     | -3.0        | mating type regulatory protein, expressed copy at MAT locus                                                                |
| <i>APC11</i>                         | -1.2        | anaphase promoting complex (APC) subunit                                                                                   |
| <i>IWR1</i>                          | -0.9        | interacts with RNA Polymerase II                                                                                           |
| <i>MSH5</i>                          | -1.2        | mutS homolog                                                                                                               |
| <i>CDC36</i>                         | -1.1        | basal transcription inhibitor; transcriptional regulator                                                                   |
| <i>RAD57</i>                         | -1.2        | RecA homolog; interacts with Rad 55p                                                                                       |
| <i>DAD1</i>                          | -1.7        | Duo1 and Dam1 interacting; localized to intranuclear spindles and spindle pole bodies                                      |
| <i>SNF11</i>                         | -1.4        | SWI/SNF global transcription activator complex component                                                                   |
| <i>TFB5</i>                          | -1.9        | Component of general transcription and DNA repair factor TFIIF                                                             |
| <i>STN1</i>                          | -1.2        | involved in telomere length regulation                                                                                     |
| <i>TAF10</i>                         | -1.2        | TFIID subunit                                                                                                              |
| <i>SPC19</i>                         | -1.2        | spindle pole component                                                                                                     |
| <i>HTA1</i>                          | -1.7        | histone H2A (HTA1 and HTA2 code for nearly identical proteins)                                                             |
| <i>MCM21</i>                         | -0.9        | Involved in minichromosome maintenance                                                                                     |
| <i>DAD4</i>                          | -1.7        | outer kinetochore protein - part of Dam1 complex                                                                           |
| <i>SEM1</i>                          | -2.6        | Regulator of exocytosis and pseudohyphal differentiation                                                                   |
| <i>DYN2</i>                          | -2.1        | dynein light chain (putative)                                                                                              |
| <i>ADA2</i>                          | -1.4        | general transcriptional adaptor or co-activator                                                                            |
| <i>BIM1</i>                          | -2.0        | binding to microtubules                                                                                                    |
| <i>YER066W</i>                       | -1.2        | questionable protein                                                                                                       |
| <i>ISC10</i>                         | -1.7        | meiosis-specific protein required for spore formation                                                                      |
| <i>GNA1</i>                          | -1.2        | glucosamine-phosphate N-acetyltransferase                                                                                  |
| <i>FAR7</i>                          | -1.0        | protein involved in G1 cell cycle arrest in response to pheromone, in a pathway different from the Far1p-dependent pathway |
| <i>SPT4</i>                          | -3.1        | transcription elongation protein                                                                                           |
| <i>SLX9</i>                          | -0.9        | protein of unknown function                                                                                                |
| <i>SYF2</i>                          | -0.9        | SYNthetic lethal with CDC40                                                                                                |
| <i>TRX2</i>                          | -1.0        | thioredoxin                                                                                                                |
| <i>CPD1</i>                          | -1.9        | 2',3'-cyclic nucleotide 3'-phosphodiesterase                                                                               |
| <i>SNF6</i>                          | -0.9        | chromatin remodeling Snf/Swi complex subunit                                                                               |
| <i>LRP1</i>                          | -1.6        | like rRNA Processing protein involved in regulation of DNA repair and recombination                                        |
| <i>YNG2</i>                          | -1.2        | NuA4 histone acetyltransferase complex component                                                                           |
| <i>SPO12</i>                         | -1.5        | sporulation protein                                                                                                        |
| <i>SPO16</i>                         | -1.0        | sporulation protein                                                                                                        |
| <i>SSP1</i>                          | -1.2        | essential for meiosis and spore formation                                                                                  |
| <i>EST3</i>                          | -1.8        | Subunit of the telomerase                                                                                                  |
| <i>REV7</i>                          | -1.5        | DNA polymerase zeta (pol-zeta) subunit                                                                                     |
| <i>STS1</i>                          | -1.1        | restores protein transport when overexpressed and rRNA stability to a sec23 mutation                                       |

| <b>Gene name</b>     | <b>Fold change</b> | <b>Gene Product</b>                                                                                          |
|----------------------|--------------------|--------------------------------------------------------------------------------------------------------------|
| <i>YIR024C</i>       | -1.1               | (putative) involved in cell cycle control                                                                    |
| <i>YJL065C</i>       | -1.0               | subunit of ISW2/yCHRAC chromatin remodelling complex                                                         |
| <i>NNF1</i>          | -1.3               | spindle pole protein, required for accurate chromosome segregation                                           |
| <i>MCM22</i>         | -1.1               | required for maintenance of chromosomes and minichromosomes                                                  |
| <i>MGM101</i>        | -0.9               | mitochondrial nucleoid protein                                                                               |
| <i>DAD2</i>          | -1.3               | outer kinetochore protein - part of Dam1 complex                                                             |
| <i>TEN1</i>          | -2.3               | protein involved in Telomeric pathways in association with Stn1                                              |
| <i>TRX1</i>          | -1.0               | thioredoxin                                                                                                  |
| <i>VPS71</i>         | -0.9               | component of the Swr1p complex that incorporates Htz1p into chromatin, required for vacuolar protein sorting |
| <i>HUG1</i>          | -1.3               | protein involved in the Mec1p-mediated checkpoint pathway that responds to DNA damage or replication arrest  |
| <i>MFT1</i>          | -1.2               | mitochondrial targeting protein                                                                              |
| <i>TAF13</i>         | -1.0               | TFIID subunit                                                                                                |
| <i>IMP2</i>          | -1.0               | protease                                                                                                     |
| <i>BUB2</i>          | -0.9               | protein required for cell cycle arrest in response to loss of microtubule function                           |
| <i>ABF2</i>          | -1.0               | HMG-1 homolog                                                                                                |
| <i>CIN4</i>          | -1.0               | GTP-binding protein                                                                                          |
| <i>TAF9</i>          | -1.2               | TFIID subunit                                                                                                |
| <i>SAP30</i>         | -1.7               | subunit of the histone deacetylase B complex                                                                 |
| <i>JNM1</i>          | -1.1               | coiled-coil domain protein required for proper nuclear migration during mitosis                              |
| <i>YMR299C</i>       | -1.3               | protein of unknown function; GFP-fusion protein localizes to the cytoplasm                                   |
| <i>SPO1</i>          | -0.9               | similar to phospholipase B                                                                                   |
| <i>HHF2</i>          | -2.3               | histone H4                                                                                                   |
| <i>HHT2</i>          | -1.4               | histone H3                                                                                                   |
| <i>NOP15</i>         | -1.4               | ribosome biogenesis                                                                                          |
| <i>GIM3</i>          | -1.4               | bovine prefoldin subunit 4 homolog (putative)                                                                |
| <i>KAR1</i>          | -1.0               | involved in spindle pole body duplication and karyogamy                                                      |
| <i>YNL213C</i>       | -1.2               | questionable protein                                                                                         |
| <i>NTG2</i>          | -1.1               | endonuclease III DNA base excision repair N-glycosylase                                                      |
| <i>HRT1</i>          | -1.1               | Skp1-Cullin-F-box ubiquitin protein ligase (SCF) subunit                                                     |
| <i>PSF3</i>          | -1.3               | a subunit of the GINS complex required for chromosomal DNA replication                                       |
| <i>CIN5</i>          | -1.1               | transcriptional activator                                                                                    |
| <i>YNG1</i>          | -1.0               | histone acetyltransferase complex component                                                                  |
| <i>SAS5</i>          | -1.0               | involved in silencing at telomeres, HML and HMR                                                              |
| <i>RFM1</i>          | -1.0               | DNA-binding protein                                                                                          |
| <i>SPS4</i>          | -1.6               | sporulation-specific protein                                                                                 |
| <i>SPC29</i>         | -1.3               | spindle pole body component                                                                                  |
| <i>SPP1</i>          | -0.9               | compass (complex proteins associated with Set1p) component                                                   |
| <i>MCM16</i>         | -1.8               | outer kinetochore protein                                                                                    |
| <i>DIB1</i>          | -1.3               | protein required for mitosis                                                                                 |
| <b>Transcription</b> |                    |                                                                                                              |
| <i>POP5</i>          | -1.3               | RNase MRP subunit (putative); RNase P integral subunit                                                       |
| <i>HTA2</i>          | -1.7               | histone H2A                                                                                                  |
| <i>POP8</i>          | -1.5               | RNase P integral subunit; subunit of RNase MRP (putative)                                                    |
| <i>HAP3</i>          | -1.3               | transcriptional activator protein of CYC1 (component of HAP2/HAP3 heteromer)                                 |
| <i>RRN10</i>         | -1.5               | upstream activation factor subunit                                                                           |
| <i>LSM2</i>          | -1.2               | snRNA-associated protein, Sm class                                                                           |
| <i>HHF1</i>          | -2.3               | histone H4 (HHF1 and HHF2 code for identical proteins)                                                       |
| <i>HHT1</i>          | -1.7               | histone H3 (HHT1 and HHT2 code for identical proteins)                                                       |
| <i>NRG2</i>          | -1.6               | NRG1 homolog                                                                                                 |

| Gene name        | Fold change | Gene Product                                                                                                    |
|------------------|-------------|-----------------------------------------------------------------------------------------------------------------|
| <i>NHP6B</i>     | -1.2        | 11 kDa nonhistone chromosomal protein                                                                           |
| <i>CBP6</i>      | -1.2        | translational activator of COB mRNA                                                                             |
| <i>RPB5</i>      | -1.1        | 25 kDa RNA polymerase subunit (common to polymerases I, II and III)                                             |
| <i>POP7</i>      | -1.4        | RNase MRP subunit (putative); RNase P integral subunit                                                          |
| <i>NTC20</i>     | -1.4        | splicing factor                                                                                                 |
| <i>SRB6</i>      | -2.1        | part of Srb/Mediator complex; transcription factor                                                              |
| <i>KRR1</i>      | -0.9        | Involved in cell division and spore germination                                                                 |
| <i>HMLALPHA1</i> | -1.6        | mating type regulatory protein, silenced copy at HML                                                            |
| <i>HMLALPHA2</i> | -2.7        | mating type regulatory protein, silenced copy at HML                                                            |
| <i>SRD1</i>      | -1.2        | protein involved in the processing of pre-rRNA to mature rRNA                                                   |
| <i>PET18</i>     | -2.2        | protein required for respiratory growth and stability of the mitochondrial genome                               |
| <i>MATALPHA2</i> | -3.0        | mating type regulatory protein, expressed copy at MAT locus                                                     |
| <i>MATALPHA1</i> | -1.5        | mating type regulatory protein, expressed copy at MAT locus                                                     |
| <i>YCR087C-A</i> | -1.2        | questionable protein                                                                                            |
| <i>HMRA1</i>     | -2.0        | mating type regulatory protein, silenced copy at HMR locus                                                      |
| <i>MSS2</i>      | -1.1        | cox2 pre-mRNA splicing factor                                                                                   |
| <i>CDC36</i>     | -1.1        | basal transcription inhibitor; transcriptional regulator                                                        |
| <i>NHP2</i>      | -2.2        | HMG-like protein                                                                                                |
| <i>NOP6</i>      | -1.8        | protein with similarity to hydrophilins, which are involved in the adaptive response to hyperosmotic conditions |
| <i>DTD1</i>      | -1.2        | D-Tyr-tRNA(Tyr) deacylase                                                                                       |
| <i>NRG1</i>      | -1.6        | binds to UAS-1 in the STA1 promoter and can interact with Ssn6; transcriptional repressor                       |
| <i>RPC11</i>     | -1.4        | TFIIS-like small Pol III subunit C11                                                                            |
| <i>SNF11</i>     | -1.4        | SWI/SNF global transcription activator complex component                                                        |
| <i>TFB5</i>      | -1.9        | Component of general transcription and DNA repair factor TFIIF                                                  |
| <i>RRP8</i>      | -1.1        | nucleolar protein required for efficient processing of pre-rRNA at site A2; methyltransferase homolog           |
| <i>RRP1</i>      | -1.0        | involved in processing rRNA precursor species to mature rRNAs                                                   |
| <i>CWC15</i>     | -2.0        | Protein involved in mRNA splicing                                                                               |
| <i>TAF10</i>     | -1.2        | TFIID subunit                                                                                                   |
| <i>HTA1</i>      | -1.7        | histone H2A (HTA1 and HTA2 code for nearly identical proteins)                                                  |
| <i>SRB7</i>      | -1.2        | RNA polymerase II holoenzyme/mediator subunit                                                                   |
| <i>LSM6</i>      | -1.2        | snRNP protein                                                                                                   |
| <i>NCB2</i>      | -1.6        | Negative Cofactor B2 is the beta subunit of a negative regulator of RNA polymerase II holoenzyme                |
| <i>YDR412W</i>   | -0.9        | protein required for cell viability                                                                             |
| <i>ADA2</i>      | -1.4        | general transcriptional adaptor or co-activator                                                                 |
| <i>SMB1</i>      | -1.1        | associated with U1 snRNP as part of the Sm-core that is common to all spliceosomal snRNPs                       |
| <i>LSM4</i>      | -1.0        | U6 snRNA associated protein                                                                                     |
| <i>LSM5</i>      | -2.0        | snRNP protein                                                                                                   |
| <i>BUR6</i>      | -2.0        | transcriptional regulator                                                                                       |
| <i>SMX2</i>      | -1.3        | snRNP G protein (human Sm-G homolog)                                                                            |
| <i>LOC1</i>      | -2.0        | nuclear protein involved in asymmetric localization of ASH1 mRNA                                                |
| <i>CGR1</i>      | -2.3        | coiled-coil protein                                                                                             |
| <i>RPB9</i>      | -1.3        | RNA polymerase II core subunit                                                                                  |
| <i>POP6</i>      | -1.4        | RNase P integral subunit; subunit of RNase MRP (putative)                                                       |
| <i>SPT4</i>      | -3.1        | transcription elongation protein                                                                                |
| <i>SMD1</i>      | -1.1        | homolog of human core snRNP protein D1, involved in snRNA maturation                                            |
| <i>PRP38</i>     | -1.1        | RNA splicing factor                                                                                             |
| <i>RRP46</i>     | -1.2        | 3'->5' exoribonuclease                                                                                          |
| <i>SYF2</i>      | -0.9        | SYnthetic lethal with CDC40                                                                                     |
| <i>CPD1</i>      | -1.9        | 2',3'-cyclic nucleotide 3'-phosphodiesterase                                                                    |
| <i>YGR251W</i>   | -1.2        | protein required for cell viability                                                                             |

| Gene name      | Fold change | Gene Product                                                                                                      |
|----------------|-------------|-------------------------------------------------------------------------------------------------------------------|
| <i>PXR1</i>    | -1.3        | possible telomerase regulator or RNA-binding protein                                                              |
| <i>SNF6</i>    | -0.9        | chromatin remodeling Snf/Swi complex subunit                                                                      |
| <i>BCD1</i>    | -0.9        | box C/D snoRNA accumulation                                                                                       |
| <i>SRB2</i>    | -1.5        | RNA polymerase II holoenzyme/mediator subunit                                                                     |
| <i>NOP10</i>   | -1.3        | H/ACA-box snoRNPs component                                                                                       |
| <i>LRP1</i>    | -1.6        | like rRNA Processing protein involved in regulation of DNA repair and recombination                               |
| <i>YHR085W</i> | -1.2        | protein of unknown function, essential for viability, may be involved in rRNA processing                          |
| <i>GAR1</i>    | -1.4        | small nucleolar RNP protein                                                                                       |
| <i>RPC10</i>   | -1.6        | RNA polymerase II subunit                                                                                         |
| <i>IMP3</i>    | -0.9        | U3 snoRNP protein                                                                                                 |
| <i>IST3</i>    | -2.1        | U2 snRNP associated protein                                                                                       |
| <i>MSL1</i>    | -1.2        | U2 snRNP component                                                                                                |
| <i>YAP5</i>    | -1.5        | transcription factor                                                                                              |
| <i>RPC17</i>   | -1.2        | RNA polymerase III subunit C17                                                                                    |
| <i>TAD2</i>    | -0.9        | tRNA-specific adenosine deaminase subunit                                                                         |
| <i>ASF1</i>    | -1.1        | anti-silencing protein that causes depression of silent loci when overexpressed                                   |
| <i>RPB4</i>    | -1.0        | RNA polymerase II fourth largest subunit                                                                          |
| <i>RPA34</i>   | -1.5        | RNA polymerase I subunit A34.5                                                                                    |
| <i>LSM8</i>    | -2.1        | snRNP protein                                                                                                     |
| <i>RPA12</i>   | -1.0        | RNA polymerase I A12.2 subunit                                                                                    |
| <i>YJR141W</i> | -1.3        | protein required for cell viability                                                                               |
| <i>MRT4</i>    | -1.3        | mRNA turnover 4                                                                                                   |
| <i>UTP11</i>   | -1.0        | U3 snoRNP protein                                                                                                 |
| <i>YKR022C</i> | -1.3        | protein required for cell viability                                                                               |
| <i>YLR016C</i> | -1.3        | questionable protein                                                                                              |
| <i>YLR022C</i> | -1.0        | protein required for cell viability                                                                               |
| <i>FYV7</i>    | -2.3        | protein involved in processing the 35S rRNA primary transcript to generate the 20S and 27SA2 pre-rRNA transcripts |
| <i>YLR145W</i> | -2.2        | protein required for cell viability                                                                               |
| <i>SMD3</i>    | -1.1        | core snRNP protein                                                                                                |
| <i>PUS5</i>    | -1.8        | RNA:pseudouridine (Psi)-synthase                                                                                  |
| <i>PDR8</i>    | -1.1        | zinc finger transcription factor                                                                                  |
| <i>SMD2</i>    | -0.9        | U1 snRNP protein of the Sm class                                                                                  |
| <i>YHC1</i>    | -1.7        | U1 snRNP protein required for pre-mRNA splicing                                                                   |
| <i>TAD3</i>    | -0.9        | tRNA-specific adenosine deaminase subunit                                                                         |
| <i>YLR405W</i> | -0.9        | dihydrouridine synthase 4                                                                                         |
| <i>TSR2</i>    | -1.3        | twenty S rRNA accumulation                                                                                        |
| <i>LSM3</i>    | -2.5        | snRNP protein                                                                                                     |
| <i>TRM9</i>    | -0.9        | mcm5U/mcm5s2U tRNA carboxyl methyltransferase                                                                     |
| <i>MFT1</i>    | -1.2        | mitochondrial targeting protein                                                                                   |
| <i>TAF13</i>   | -1.0        | TFIID subunit                                                                                                     |
| <i>YML107C</i> | -1.3        | protein of unknown function; GFP-fusion protein localizes to the nuclear periphery                                |
| <i>DAT1</i>    | -1.2        | datin, oligo(dA)/oligo(dT)-binding protein                                                                        |
| <i>SEN15</i>   | -1.2        | tetrameric tRNA splicing endonuclease 15kDa subunit                                                               |
| <i>CTL1</i>    | -1.3        | RNA triphosphatase                                                                                                |
| <i>TAF9</i>    | -1.2        | TFIID subunit                                                                                                     |
| <i>SAP30</i>   | -1.7        | subunit of the histone deacetylase B complex                                                                      |
| <i>RLP7</i>    | -1.3        | nucleolar protein related to ribosomal protein L7                                                                 |
| <i>SPO1</i>    | -0.9        | similar to phospholipase B                                                                                        |
| <i>HHF2</i>    | -2.3        | histone H4                                                                                                        |
| <i>HHT2</i>    | -1.4        | histone H3                                                                                                        |
| <i>RPC19</i>   | -1.2        | RNA polymerases I (A) and III (C) subunit                                                                         |
| <i>LSM7</i>    | -1.6        | snRNP protein                                                                                                     |

| <b>Gene name</b> | <b>Fold change</b> | <b>Gene Product</b>                                                                                                       |
|------------------|--------------------|---------------------------------------------------------------------------------------------------------------------------|
| <i>RPB11</i>     | -1.2               | RNA polymerase II core subunit                                                                                            |
| <i>YOL101C</i>   | -0.9               | questionable protein                                                                                                      |
| <i>INO4</i>      | -1.7               | basic helix-loop-helix (bHLH) protein                                                                                     |
| <i>HRT1</i>      | -1.1               | Skp1-Cullin-F-box ubiquitin protein ligase (SCF) subunit                                                                  |
| <i>DCP1</i>      | -0.9               | mRNA decapping enzyme                                                                                                     |
| <i>YOR004W</i>   | -1.2               | protein required for cell viability                                                                                       |
| <i>CIN5</i>      | -1.1               | transcriptional activator                                                                                                 |
| <i>BUD21</i>     | -1.5               | U3 snoRNP protein                                                                                                         |
| <i>SPP2</i>      | -1.7               | required for final stages of spliceosome maturation                                                                       |
| <i>SME1</i>      | -1.0               | spliceosomal snRNA-associated Sm core protein required for mRNA splicing, also likely associated with telomerase TLC1 RNA |
| <i>RPB10</i>     | -1.9               | RNA polymerase II core subunit                                                                                            |
| <i>SAS5</i>      | -1.0               | involved in silencing at telomeres, HML and HMR                                                                           |
| <i>RPB8</i>      | -0.9               | DNA-directed RNA polymerase I, II, III 16 KD subunit                                                                      |
| <i>YOR287C</i>   | -1.7               | protein required for cell viability                                                                                       |
| <i>RRS1</i>      | -1.2               | regulator for ribosome synthesis                                                                                          |
| <i>MBF1</i>      | -1.9               | multiprotein bridging factor                                                                                              |
| <i>MET31</i>     | -1.2               | transcriptional regulator of sulfur amino acid metabolism                                                                 |
| <i>YPL047W</i>   | -1.4               | questionable protein                                                                                                      |
| <i>SPP1</i>      | -0.9               | compass (complex proteins associated with Set1p) component                                                                |
| <i>TIF6</i>      | -1.0               | translation initiation factor 6 (eIF6)                                                                                    |
| <i>BRR1</i>      | -0.9               | spliceosomal snRNP component                                                                                              |
| <i>DIB1</i>      | -1.3               | protein required for mitosis                                                                                              |
| <i>RDS3</i>      | -2.0               | protein required for cell viability                                                                                       |
| <i>SNT309</i>    | -1.5               | protein complex component associated with the splicing factor Prp19p                                                      |
| <i>YPR143W</i>   | -1.3               | protein required for cell viability                                                                                       |
| <i>RPO26</i>     | -1.5               | RNA polymerases I, II, and III subunit                                                                                    |

#### **Protein synthesis**

|                |      |                                                                        |
|----------------|------|------------------------------------------------------------------------|
| <i>ECM1</i>    | -1.7 | putative transmembrane domain protein involved in cell wall biogenesis |
| <i>CBP6</i>    | -1.2 | translational activator of COB mRNA                                    |
| <i>MRPL37</i>  | -1.3 | mitochondrial ribosomal protein of the large subunit                   |
| <i>MRPL27</i>  | -1.7 | mitochondrial ribosomal protein of the large subunit                   |
| <i>KRR1</i>    | -0.9 | Involved in cell division and spore germination                        |
| <i>MRPL32</i>  | -1.7 | ribosomal protein (YmL32)                                              |
| <i>IMG2</i>    | -1.1 | mitochondrial ribosomal protein of the small subunit                   |
| <i>DTD1</i>    | -1.2 | D-Tyr-tRNA(Tyr) deacylase                                              |
| <i>YDR115W</i> | -1.4 | questionable protein                                                   |
| <i>YDR185C</i> | -1.1 | questionable protein                                                   |
| <i>RPL27B</i>  | -0.9 | ribosomal protein L27B                                                 |
| <i>SLF1</i>    | -1.1 | La motif-containing proteins that modulate mRNA translation            |
| <i>NOP16</i>   | -1.4 | ribosome biogenesis                                                    |
| <i>RSM18</i>   | -1.1 | mitochondrial ribosome small subunit component                         |
| <i>RPS24A</i>  | -1.0 | ribosomal protein S24A                                                 |
| <i>RPL23B</i>  | -0.9 | ribosomal protein L23B (L17aB) (YL32)                                  |
| <i>RPL22B</i>  | -1.6 | ribosomal protein L22B (L1c) (rp4) (YL31)                              |
| <i>LOC1</i>    | -2.0 | nuclear protein involved in asymmetric localization of ASH1 mRNA       |
| <i>RPL29</i>   | -0.9 | ribosomal protein L29 (YL43)                                           |
| <i>CGR1</i>    | -2.3 | coiled-coil protein                                                    |
| <i>MRPL25</i>  | -1.3 | mitochondrial ribosomal protein of the large subunit                   |
| <i>YGR201C</i> | -1.0 | questionable protein                                                   |
| <i>RSM27</i>   | -2.0 | mitochondrial ribosome small subunit component                         |
| <i>RPL27A</i>  | -1.0 | ribosomal protein L27A                                                 |
| <i>IMP3</i>    | -0.9 | U3 snoRNP protein                                                      |
| <i>PET130</i>  | -1.1 | protein required for respiratory growth                                |
| <i>MRPL49</i>  | -0.9 | mitochondrial ribosomal protein of the large subunit                   |



| <b>Gene name</b>    | <b>Fold change</b> | <b>Gene Product</b>                                                                                                                                                                    |
|---------------------|--------------------|----------------------------------------------------------------------------------------------------------------------------------------------------------------------------------------|
| <i>RPS21B</i>       | -1.7               | ribosomal protein S21B (S26B) (YS25)                                                                                                                                                   |
| <i>RPL39</i>        | -1.3               | ribosomal protein L39 (L46) (YL40)                                                                                                                                                     |
| <i>RPL43B</i>       | -1.0               | ribosomal protein L43B                                                                                                                                                                 |
| <i>MRP17</i>        | -1.5               | ribosomal protein MRP17                                                                                                                                                                |
| <i>MRT4</i>         | -1.3               | mRna turnover 4                                                                                                                                                                        |
| <i>MRPL31</i>       | -1.0               | mitochondrial ribosomal protein of the large subunit                                                                                                                                   |
| <i>RPS27A</i>       | -1.0               | ribosomal protein S27A (rp61) (YS20)                                                                                                                                                   |
| <i>RPS21A</i>       | -1.2               | ribosomal protein S21A (S26A) (YS25)                                                                                                                                                   |
| <i>RPL37A</i>       | -1.3               | ribosomal protein L37A (L43) (YL35)                                                                                                                                                    |
| <i>YLR221C</i>      | -0.9               | riboSome Assembly                                                                                                                                                                      |
| <i>RPS28B</i>       | -1.0               | ribosomal protein S28B (S33B) (YS27)                                                                                                                                                   |
| <i>RPS30A</i>       | -1.1               | ribosomal protein S30A                                                                                                                                                                 |
| <i>MRPL15</i>       | -1.4               | mitochondrial ribosomal protein of the large subunit                                                                                                                                   |
| <i>RPL38</i>        | -1.0               | ribosomal protein L38                                                                                                                                                                  |
| <i>RPS29A</i>       | -1.1               | ribosomal protein S29A (S36A) (YS29)                                                                                                                                                   |
| <i>MRPL39</i>       | -1.2               | mitochondrial ribosomal protein of the large subunit                                                                                                                                   |
| <i>TRM9</i>         | -0.9               | mcm5U/mcm5s2U tRNA carboxyl methyltransferase                                                                                                                                          |
| <i>RPS18B</i>       | -0.9               | ribosomal protein S18B                                                                                                                                                                 |
| <i>MRPS8</i>        | -1.2               | mitochondrial ribosomal protein of the small subunit                                                                                                                                   |
| <i>MRPS17</i>       | -0.9               | mitochondrial ribosomal protein of the small subunit                                                                                                                                   |
| <i>MRPL44</i>       | -1.3               | mitochondrial ribosomal protein of the large subunit                                                                                                                                   |
| <i>TIF11</i>        | -1.2               | translation initiation factor eIF1A                                                                                                                                                    |
| <i>MRPL33</i>       | -1.6               | mitochondrial ribosomal protein of the large subunit                                                                                                                                   |
| <i>RLP7</i>         | -1.3               | nucleolar protein related to ribosomal protein L7                                                                                                                                      |
| <i>NOP15</i>        | -1.4               | ribosome biogenesis                                                                                                                                                                    |
| <i>SUI1</i>         | -1.7               | translation initiation factor eIF1                                                                                                                                                     |
| <i>MRPL50</i>       | -1.2               | mitochondrial ribosomal protein of the large subunit, not essential for mitochondrial translation                                                                                      |
| <i>RSM19</i>        | -1.0               | mitochondrial ribosome small subunit component                                                                                                                                         |
| <i>RPS28A</i>       | -1.3               | ribosomal protein S28A (S33A) (YS27)                                                                                                                                                   |
| <i>RPS30B</i>       | -1.3               | ribosomal protein S30B                                                                                                                                                                 |
| <i>RPL33B</i>       | -1.2               | ribosomal protein L33B (L37B) (rp47) (YL37)                                                                                                                                            |
| <i>RRS1</i>         | -1.2               | regulator for ribosome synthesis                                                                                                                                                       |
| <i>TIF6</i>         | -1.0               | translation initiation factor 6 (eIF6)                                                                                                                                                 |
| <i>MRPL51</i>       | -1.1               | mitochondrial ribosomal protein of the large subunit                                                                                                                                   |
| <i>YPR143W</i>      | -1.3               | protein required for cell viability                                                                                                                                                    |
| <i>MRP2</i>         | -0.9               | mitochondrial ribosomal protein, small subunit                                                                                                                                         |
| <b>Protein fate</b> |                    |                                                                                                                                                                                        |
| <i>PEX22</i>        | -1.6               | product of gene unknown                                                                                                                                                                |
| <i>LDB7</i>         | -0.9               | protein involved in mannosylphosphorylation of cell wall mannoproteins                                                                                                                 |
| <i>PRE7</i>         | -0.9               | proteasome subunit                                                                                                                                                                     |
| <i>KTI11</i>        | -1.2               | similar to Hemiascomycetous yeast protein                                                                                                                                              |
| <i>RER2</i>         | -0.9               | cis-prenyltransferase                                                                                                                                                                  |
| <i>MRS5</i>         | -1.0               | involved in mitochondrial biogenesis                                                                                                                                                   |
| <i>ATG14</i>        | -1.5               | required for autophagy                                                                                                                                                                 |
| <i>YSY6</i>         | -3.4               | protein that participates in secretory pathway                                                                                                                                         |
| <i>UBS1</i>         | -1.0               | general positive regulator of CDC34                                                                                                                                                    |
| <i>DER1</i>         | -1.1               | endoplasmic reticulum membrane protein, required for the protein degradation process associated with the ER, involved in the retrograde transport of misfolded or unassembled proteins |
| <i>ATG12</i>        | -2.3               | component of the autophagic system                                                                                                                                                     |
| <i>SHG1</i>         | -1.5               | compass (complex proteins associated with Set1p) component                                                                                                                             |
| <i>MAK31</i>        | -1.8               | member of the Sm protein family                                                                                                                                                        |
| <i>YCR060W</i>      | -1.5               | questionable protein                                                                                                                                                                   |
| <i>APC11</i>        | -1.2               | anaphase promoting complex (APC) subunit                                                                                                                                               |
| <i>PEX19</i>        | -1.2               | 40 kDa farnesylated protein associated with peroxisomes                                                                                                                                |

| Gene name      | Fold change | Gene Product                                                                                               |
|----------------|-------------|------------------------------------------------------------------------------------------------------------|
| <i>COX9</i>    | -2.0        | cytochrome c oxidase subunit VIIa                                                                          |
| <i>SRP14</i>   | -1.4        | signal recognition particle subunit                                                                        |
| <i>MSS2</i>    | -1.1        | cox2 pre-mRNA splicing factor                                                                              |
| <i>OST4</i>    | -0.9        | oligosaccharyltransferase subunit                                                                          |
| <i>TFB5</i>    | -1.9        | Component of general transcription and DNA repair factor TFIIH                                             |
| <i>SSS1</i>    | -1.6        | ER protein-translocase complex subunit                                                                     |
| <i>RUB1</i>    | -1.3        | ubiquitin-like protein                                                                                     |
| <i>TAF10</i>   | -1.2        | TFIID subunit                                                                                              |
| <i>UBC1</i>    | -1.2        | ubiquitin-conjugating enzyme                                                                               |
| <i>CSN9</i>    | -2.7        | COP9 signalosome (CSN) subunit                                                                             |
| <i>YDR185C</i> | -1.1        | questionable protein                                                                                       |
| <i>GPI11</i>   | -1.3        | protein involved in glycosylphosphatidylinositol (GPI) biosynthesis                                        |
| <i>TIM11</i>   | -1.7        | mitochondrial F1F0-ATPase subunit e                                                                        |
| <i>SEM1</i>    | -2.6        | Regulator of exocytosis and pseudohyphal differentiation                                                   |
| <i>ADA2</i>    | -1.4        | general transcriptional adaptor or co-activator                                                            |
| <i>YDR459C</i> | -1.2        | likely functions in pathway(s) outside Ras                                                                 |
| <i>FPR2</i>    | -1.0        | FKBP13 (FK506 binding protein) peptidyl-prolyl cis-trans isomerase (PPIase)                                |
| <i>QCR7</i>    | -1.1        | ubiquinol cytochrome C oxidoreductase subunit 7                                                            |
| <i>GIM4</i>    | -2.0        | bovine prefoldin subunit 2 homolog (putative)                                                              |
| <i>UBC8</i>    | -1.0        | ubiquitin-conjugating enzyme; ubiquitin-protein ligase                                                     |
| <i>TIM9</i>    | -1.8        | essential subunit of the TIM22-complex for mitochondrial protein import                                    |
| <i>SBH2</i>    | -1.5        | Sbh1p homolog                                                                                              |
| <i>PET117</i>  | -1.5        | protein required for assembly of cytochrome c oxidase                                                      |
| <i>YPT1</i>    | -0.9        | GTP-binding protein; ras homolog                                                                           |
| <i>YPI1</i>    | -1.0        | PP1 phosphatase inhibitor                                                                                  |
| <i>LYS5</i>    | -1.0        | alpha aminoacidate reductase phosphopantetheinyl transferase                                               |
| <i>BRR6</i>    | -1.5        | nuclear envelope protein                                                                                   |
| <i>SMD1</i>    | -1.1        | homolog of human core snRNP protein D1, involved in snRNA maturation                                       |
| <i>VMA21</i>   | -1.7        | protein involved in vacuolar H-ATPase assembly or function                                                 |
| <i>TRX2</i>    | -1.0        | thioredoxin                                                                                                |
| <i>PEX21</i>   | -1.3        | peroxin                                                                                                    |
| <i>MRS11</i>   | -1.4        | subunit of the Tim22-complex                                                                               |
| <i>VMA22</i>   | -1.9        | required for V-ATPase activity                                                                             |
| <i>WSS1</i>    | -1.6        | weak suppressor of smt3                                                                                    |
| <i>SSP1</i>    | -1.2        | essential for meiosis and spore formation                                                                  |
| <i>URM1</i>    | -1.5        | ubiquitin-like protein                                                                                     |
| <i>YRB2</i>    | -0.9        | nuclear protein that interacts with Gsp1p and Crm1p                                                        |
| <i>FMC1</i>    | -1.2        | assembly factor of ATP synthase in heat stress                                                             |
| <i>IST3</i>    | -2.1        | U2 snRNP associated protein                                                                                |
| <i>MSL1</i>    | -1.2        | U2 snRNP component                                                                                         |
| <i>STS1</i>    | -1.1        | restores protein transport when overexpressed and rRNA stability to a sec23 mutation                       |
| <i>YJL104W</i> | -0.9        | presequence translocase-associated motor, constituent of the mitochondrial import motor PAM                |
| <i>PF1D1</i>   | -1.3        | bovine prefoldin subunit 1 homolog (putative)                                                              |
| <i>GON7</i>    | -1.4        | protein proposed to be involved in the transfer of mannosylphosphate groups onto N-linked oligosaccharides |
| <i>SPC1</i>    | -2.5        | homolog of the SPC12 subunit of mammalian signal peptidase complex                                         |
| <i>APS2</i>    | -1.0        | clathrin associated protein complex small subunit                                                          |
| <i>YJR097W</i> | -1.5        | protein that may function as a cochaperone                                                                 |
| <i>TIM8</i>    | -1.0        | mitochondrial protein import machinery subunit                                                             |
| <i>VPS24</i>   | -1.3        | involved in secretion                                                                                      |
| <i>VPH2</i>    | -1.0        | 25.2 kDa protein involved in assembly of vacuolar H(+) ATPase                                              |
| <i>SRP21</i>   | -1.7        | signal recognition particle component                                                                      |
| <i>DID2</i>    | -1.2        | class E vacuolar-protein sorting and endocytosis factor                                                    |

| <b>Gene name</b> | <b>Fold change</b> | <b>Gene Product</b>                                                                                          |
|------------------|--------------------|--------------------------------------------------------------------------------------------------------------|
| <i>COX17</i>     | -1.5               | cysteine-rich protein                                                                                        |
| <i>ATG10</i>     | -1.5               | protein-conjugating enzyme                                                                                   |
| <i>COX12</i>     | -1.1               | cytochrome c oxidase subunit VIb                                                                             |
| <i>TRX1</i>      | -1.0               | thioredoxin                                                                                                  |
| <i>SRN2</i>      | -1.1               | suppressor of rna1-1 mutation                                                                                |
| <i>APS1</i>      | -1.0               | clathrin associated protein complex small subunit                                                            |
| <i>YKE2</i>      | -1.1               | Gim complex component                                                                                        |
| <i>YLR243W</i>   | -1.1               | protein required for cell viability                                                                          |
| <i>UBC12</i>     | -1.7               | ubiquitin-conjugating enzyme                                                                                 |
| <i>VPS71</i>     | -0.9               | component of the Swr1p complex that incorporates Htz1p into chromatin, required for vacuolar protein sorting |
| <i>MFT1</i>      | -1.2               | mitochondrial targeting protein                                                                              |
| <i>COX14</i>     | -1.2               | mitochondrial membrane protein                                                                               |
| <i>IMP2</i>      | -1.0               | protease                                                                                                     |
| <i>TAF9</i>      | -1.2               | TFIID subunit                                                                                                |
| <i>COX7</i>      | -2.2               | cytochrome c oxidase subunit VII                                                                             |
| <i>SAP30</i>     | -1.7               | subunit of the histone deacetylase B complex                                                                 |
| <i>GOT1</i>      | -1.2               | membrane protein                                                                                             |
| <i>GPI15</i>     | -1.6               | human Pig-H homolog                                                                                          |
| <i>TOM7</i>      | -0.9               | translocase of the outer mitochondrial membrane                                                              |
| <i>YPT53</i>     | -1.0               | GTP-binding protein; rab family                                                                              |
| <i>GIM3</i>      | -1.4               | bovine prefoldin subunit 4 homolog (putative)                                                                |
| <i>ATX1</i>      | -1.4               | copper binding homeostasis protein (putative)                                                                |
| <i>HUB1</i>      | -1.5               | ubiquitin-like modifier                                                                                      |
| <i>HRT1</i>      | -1.1               | Skp1-Cullin-F-box ubiquitin protein ligase (SCF) subunit                                                     |
| <i>YSP3</i>      | -1.0               | subtilisin-like protease III                                                                                 |
| <i>HSP10</i>     | -1.6               | heat shock protein 10                                                                                        |
| <i>PEP12</i>     | -1.0               | syntaxin (T-SNARE), vacuolar                                                                                 |
| <i>TOM6</i>      | -2.1               | mitochondrial outer membrane import receptor subunit, 6 kD                                                   |
| <i>YNG1</i>      | -1.0               | histone acetyltransferase complex component                                                                  |
| <i>ARF3</i>      | -1.1               | GTP-binding ADP-ribosylation factor                                                                          |
| <i>OST2</i>      | -1.4               | oligosaccharyltransferase epsilon subunit                                                                    |
| <i>SAS5</i>      | -1.0               | involved in silencing at telomeres, HML and HMR                                                              |
| <i>MGE1</i>      | -0.9               | GrpE homolog                                                                                                 |
| <i>NAT5</i>      | -2.4               | N-acetyltransferase                                                                                          |
| <i>ARL3</i>      | -0.9               | ADP-ribosylation factor-like protein, member of the arf-sar family in the ras superfamily                    |
| <i>VPS28</i>     | -1.0               | protein involved in vacuolar traffic                                                                         |
| <i>SPP1</i>      | -0.9               | compass (complex proteins associated with Set1p) component                                                   |
| <i>PPT2</i>      | -2.1               | phosphopantetheine:protein transferase (PPTase)                                                              |
| <i>ATG5</i>      | -1.6               | Involved in autophagy                                                                                        |
| <i>TFP3</i>      | -1.1               | vacuolar ATPase V0 domain subunit c' (17 kDa) vacuolar H(+) ATPase 17 kDa subunit C                          |
| <i>MAK3</i>      | -1.1               | N-acetyltransferase                                                                                          |
| <i>BRR1</i>      | -0.9               | spliceosomal snRNP component                                                                                 |

#### **Regulation of metabolism and protein function**

|                  |      |                                                                                                  |
|------------------|------|--------------------------------------------------------------------------------------------------|
| <i>NRG2</i>      | -1.6 | NRG1 homolog                                                                                     |
| <i>POL30</i>     | -1.1 | proliferating Cell Nuclear Antigen (PCNA)                                                        |
| <i>HMLALPHA1</i> | -1.6 | mating type regulatory protein, silenced copy at HML                                             |
| <i>HMLALPHA2</i> | -2.7 | mating type regulatory protein, silenced copy at HML                                             |
| <i>MATALPHA2</i> | -3.0 | mating type regulatory protein, expressed copy at MAT locus                                      |
| <i>MATALPHA1</i> | -1.5 | mating type regulatory protein, expressed copy at MAT locus                                      |
| <i>HMRA1</i>     | -2.0 | mating type regulatory protein, silenced copy at HMR locus                                       |
| <i>INH1</i>      | -1.4 | ATPase inhibitor                                                                                 |
| <i>NCB2</i>      | -1.6 | Negative Cofactor B2 is the beta subunit of a negative regulator of RNA polymerase II holoenzyme |

| Gene name    | Fold change | Gene Product                                                                       |
|--------------|-------------|------------------------------------------------------------------------------------|
| <i>ADA2</i>  | -1.4        | general transcriptional adaptor or co-activator                                    |
| <i>BUR6</i>  | -2.0        | transcriptional regulator                                                          |
| <i>YPI1</i>  | -1.0        | PP1 phosphatase inhibitor                                                          |
| <i>PEX21</i> | -1.3        | peroxin                                                                            |
| <i>YNG2</i>  | -1.2        | NuA4 histone acetyltransferase complex component                                   |
| <i>SPL2</i>  | -1.7        | suppressor of <i>plc1-delta</i>                                                    |
| <i>KTI12</i> | -1.1        | elongator associated protein                                                       |
| <i>BUB2</i>  | -0.9        | protein required for cell cycle arrest in response to loss of microtubule function |
| <i>MBF1</i>  | -1.9        | multiprotein bridging factor                                                       |
| <i>ERI1</i>  | -1.2        | ER-associated Ras Inhibitor                                                        |

#### Cellular transport, transport facilities and transport routes

|                |      |                                                                                                       |
|----------------|------|-------------------------------------------------------------------------------------------------------|
| <i>PEX22</i>   | -1.6 | product of gene unknown                                                                               |
| <i>YBR043C</i> | -1.0 | protein of unknown function, may have a role in drug resistance                                       |
| <i>MRS5</i>    | -1.0 | involved in mitochondrial biogenesis                                                                  |
| <i>YMC2</i>    | -1.0 | mitochondrial carrier protein                                                                         |
| <i>YSY6</i>    | -3.4 | protein that participates in secretory pathway                                                        |
| <i>UBS1</i>    | -1.0 | general positive regulator of <i>CDC34</i>                                                            |
| <i>ATG12</i>   | -2.3 | component of the autophagic system                                                                    |
| <i>TRS20</i>   | -1.9 | trapp subunit of 20 kDa                                                                               |
| <i>YPT10</i>   | -1.0 | similar to Rab proteins and other small GTP-binding proteins                                          |
| <i>CTP1</i>    | -1.2 | citrate transporter                                                                                   |
| <i>GRX1</i>    | -1.1 | glutaredoxin                                                                                          |
| <i>TRX3</i>    | -0.9 | thioredoxin                                                                                           |
| <i>PEX19</i>   | -1.2 | 40 kDa farnesylated protein associated with peroxisomes                                               |
| <i>COX9</i>    | -2.0 | cytochrome c oxidase subunit VIIa                                                                     |
| <i>SRP14</i>   | -1.4 | signal recognition particle subunit                                                                   |
| <i>MSS2</i>    | -1.1 | <i>cox2</i> pre-mRNA splicing factor                                                                  |
| <i>INH1</i>    | -1.4 | ATPase inhibitor                                                                                      |
| <i>SSS1</i>    | -1.6 | ER protein-translocase complex subunit                                                                |
| <i>UBC1</i>    | -1.2 | ubiquitin-conjugating enzyme                                                                          |
| <i>TIM11</i>   | -1.7 | mitochondrial F1F0-ATPase subunit e                                                                   |
| <i>SEM1</i>    | -2.6 | Regulator of exocytosis and pseudohyphal differentiation                                              |
| <i>DYN2</i>    | -2.1 | dynein light chain (putative)                                                                         |
| <i>TIM9</i>    | -1.8 | essential subunit of the TIM22-complex for mitochondrial protein import                               |
| <i>SBH2</i>    | -1.5 | Sbh1p homolog                                                                                         |
| <i>YPT1</i>    | -0.9 | GTP-binding protein; ras homolog                                                                      |
| <i>LOC1</i>    | -2.0 | nuclear protein involved in asymmetric localization of <i>ASH1</i> mRNA                               |
| <i>ERV14</i>   | -0.9 | 14 kDa protein found on ER-derived vesicles                                                           |
| <i>BRR6</i>    | -1.5 | nuclear envelope protein                                                                              |
| <i>VMA7</i>    | -1.2 | vacuolar ATPase V1 domain subunit F (14 kDa)                                                          |
| <i>LST7</i>    | -1.1 | required for amino acid permease transport from the Golgi to the cell surface                         |
| <i>YGR131W</i> | -1.7 | questionable protein                                                                                  |
| <i>TRX2</i>    | -1.0 | thioredoxin                                                                                           |
| <i>PEX21</i>   | -1.3 | peroxin                                                                                               |
| <i>MRS11</i>   | -1.4 | subunit of the Tim22-complex                                                                          |
| <i>VMA10</i>   | -1.2 | vacuolar ATPase V1 domain subunit G (13 kDa)                                                          |
| <i>BET1</i>    | -1.6 | membrane protein required for vesicular transport between the endoplasmic reticulum and Golgi complex |
| <i>YIL040W</i> | -1.0 | protein of unknown function, localizes to the endoplasmic reticulum                                   |
| <i>YRB2</i>    | -0.9 | nuclear protein that interacts with Gsp1p and Crm1p                                                   |
| <i>QDR1</i>    | -0.9 | multidrug resistance transporter                                                                      |
| <i>FLX1</i>    | -0.9 | FAD carrier protein                                                                                   |
| <i>STS1</i>    | -1.1 | restores protein transport when overexpressed and rRNA stability to a <i>sec23</i> mutation           |

| Gene name      | Fold change | Gene Product                                                                                                 |
|----------------|-------------|--------------------------------------------------------------------------------------------------------------|
| <i>SYS1</i>    | -1.0        | multicopy suppressor of ypt6 null mutation                                                                   |
| <i>YJL104W</i> | -0.9        | presequence translocase-associated motor, constituent of the mitochondrial import motor PAM                  |
| <i>NCE101</i>  | -1.4        | involved in secretion of proteins that lack classical secretory signal sequences                             |
| <i>CYC1</i>    | -0.9        | iso-1-cytochrome c                                                                                           |
| <i>APS2</i>    | -1.0        | clathrin associated protein complex small subunit                                                            |
| <i>TIM8</i>    | -1.0        | mitochondrial protein import machinery subunit                                                               |
| <i>SFT1</i>    | -1.5        | v-SNARE                                                                                                      |
| <i>VPS24</i>   | -1.3        | involved in secretion                                                                                        |
| <i>SRP21</i>   | -1.7        | signal recognition particle component                                                                        |
| <i>MTR2</i>    | -1.8        | mRNA transport regulator                                                                                     |
| <i>DID2</i>    | -1.2        | class E vacuolar-protein sorting and endocytosis factor                                                      |
| <i>BET3</i>    | -0.9        | transport protein particle (TRAPP) component                                                                 |
| <i>COX17</i>   | -1.5        | cysteine-rich protein                                                                                        |
| <i>ATG10</i>   | -1.5        | protein-conjugating enzyme                                                                                   |
| <i>YLR004C</i> | -1.0        | questionable protein                                                                                         |
| <i>YLR016C</i> | -1.3        | questionable protein                                                                                         |
| <i>COX12</i>   | -1.1        | cytochrome c oxidase subunit VIb                                                                             |
| <i>TRX1</i>    | -1.0        | thioredoxin                                                                                                  |
| <i>SRN2</i>    | -1.1        | suppressor of rna1-1 mutation                                                                                |
| <i>ZRT2</i>    | -0.9        | low affinity zinc transport protein                                                                          |
| <i>APS1</i>    | -1.0        | clathrin associated protein complex small subunit                                                            |
| <i>ARV1</i>    | -1.0        | protein involved in sterol distribution                                                                      |
| <i>COX8</i>    | -1.0        | cytochrome c oxidase chain VIII                                                                              |
| <i>ERV25</i>   | -1.0        | vesicle coat component                                                                                       |
| <i>VPS71</i>   | -0.9        | component of the Swr1p complex that incorporates Htz1p into chromatin, required for vacuolar protein sorting |
| <i>MFT1</i>    | -1.2        | mitochondrial targeting protein                                                                              |
| <i>ATP18</i>   | -1.7        | ATP synthase associated protein                                                                              |
| <i>YML107C</i> | -1.3        | protein of unknown function; GFP-fusion protein localizes to the nuclear periphery                           |
| <i>VPS20</i>   | -0.9        | vacuolar protein sorting (putative)                                                                          |
| <i>GFD1</i>    | -1.2        | protein of the nuclear pore complex                                                                          |
| <i>COX7</i>    | -2.2        | cytochrome c oxidase subunit VII                                                                             |
| <i>GOT1</i>    | -1.2        | membrane protein                                                                                             |
| <i>JNM1</i>    | -1.1        | coiled-coil domain protein required for proper nuclear migration during mitosis                              |
| <i>YMR299C</i> | -1.3        | protein of unknown function; GFP-fusion protein localizes to the cytoplasm                                   |
| <i>NCE103</i>  | -1.4        | carbonic anhydrase-like protein                                                                              |
| <i>TOM7</i>    | -0.9        | translocase of the outer mitochondrial membrane                                                              |
| <i>YPT53</i>   | -1.0        | GTP-binding protein; rab family                                                                              |
| <i>CYB5</i>    | -1.1        | cytochrome b5                                                                                                |
| <i>ATX1</i>    | -1.4        | copper binding homeostasis protein (putative)                                                                |
| <i>ATP19</i>   | -1.2        | ATP synthase subunit k homolog                                                                               |
| <i>PEP12</i>   | -1.0        | syntaxin (T-SNARE), vacuolar                                                                                 |
| <i>TOM6</i>    | -2.1        | mitochondrial outer membrane import receptor subunit, 6 kD                                                   |
| <i>ARF3</i>    | -1.1        | GTP-binding ADP-ribosylation factor                                                                          |
| <i>ORT1</i>    | -1.0        | Mitochondrial ornithine carrier - member of the mitochondrial carrier family                                 |
| <i>MGE1</i>    | -0.9        | GrpE homolog                                                                                                 |
| <i>RET3</i>    | -0.9        | vesicle coat component                                                                                       |
| <i>ARL3</i>    | -0.9        | ADP-ribosylation factor-like protein, member of the arf-sar family in the ras superfamily                    |
| <i>VPS28</i>   | -1.0        | protein involved in vacuolar traffic                                                                         |
| <i>PPT2</i>    | -2.1        | phosphopantetheine:protein transferase (PPTase)                                                              |
| <i>ATG5</i>    | -1.6        | Involved in autophagy                                                                                        |
| <i>OYE3</i>    | -1.8        | NADPH dehydrogenase                                                                                          |

| <b>Gene name</b>                                             | <b>Fold change</b> | <b>Gene Product</b>                                                                                             |
|--------------------------------------------------------------|--------------------|-----------------------------------------------------------------------------------------------------------------|
| <i>TFP3</i>                                                  | -1.1               | vacuolar ATPase V0 domain subunit c' (17 kDa) vacuolar H(+) ATPase 17 kDa subunit C                             |
| <i>ATP15</i>                                                 | -1.3               | ATP synthase epsilon subunit                                                                                    |
| <i>ATP20</i>                                                 | -1.5               | ATP synthase subunit g homolog                                                                                  |
| <b>Cellular communication /Signal transduction mechanism</b> |                    |                                                                                                                 |
| <i>MFA1</i>                                                  | -2.0               | a-factor mating pheromone precursor                                                                             |
| <i>STE18</i>                                                 | -1.6               | G protein gamma subunit; coupled to mating factor receptor                                                      |
| <i>MFA2</i>                                                  | -1.7               | a-factor mating pheromone precursor                                                                             |
| <i>ZEO1</i>                                                  | -2.1               | Mid2p-interacting protein, modulates the PKC1-MPK1 cell integrity pathway                                       |
| <i>ERI1</i>                                                  | -1.2               | ER-associated Ras Inhibitor                                                                                     |
| <b>Cell rescue, defense and virulence</b>                    |                    |                                                                                                                 |
| <i>YBR043C</i>                                               | -1.0               | protein of unknown function, may have a role in drug resistance                                                 |
| <i>GPX2</i>                                                  | -1.4               | phospholipid hydroperoxide glutathione peroxidase                                                               |
| <i>GRX1</i>                                                  | -1.1               | glutaredoxin                                                                                                    |
| <i>YCR060W</i>                                               | -1.5               | questionable protein                                                                                            |
| <i>TRX3</i>                                                  | -0.9               | thioredoxin                                                                                                     |
| <i>NOP6</i>                                                  | -1.8               | protein with similarity to hydrophilins, which are involved in the adaptive response to hyperosmotic conditions |
| <i>RAD57</i>                                                 | -1.2               | RecA homolog; interacts with Rad 55p                                                                            |
| <i>NRG1</i>                                                  | -1.6               | binds to UAS-1 in the STA1 promoter and can interact with Ssn6; transcriptional repressor                       |
| <i>PET100</i>                                                | -1.5               | cytochrome c oxidase-specific assembly factor                                                                   |
| <i>CTA1</i>                                                  | -1.8               | catalase A                                                                                                      |
| <i>TSA2</i>                                                  | -1.0               | thioredoxin-peroxidase                                                                                          |
| <i>FPR2</i>                                                  | -1.0               | FKBP13 (FK506 binding protein) peptidyl-prolyl cis-trans isomerase (PPIase)                                     |
| <i>TIM9</i>                                                  | -1.8               | essential subunit of the TIM22-complex for mitochondrial protein import                                         |
| <i>YER187W</i>                                               | -2.1               | questionable protein                                                                                            |
| <i>SNO3</i>                                                  | -0.9               | protein is related with B(1) biosynthesis during the exponential phase                                          |
| <i>TRX2</i>                                                  | -1.0               | thioredoxin                                                                                                     |
| <i>MRS11</i>                                                 | -1.4               | subunit of the Tim22-complex                                                                                    |
| <i>DOG2</i>                                                  | -0.9               | 2-deoxyglucose-6-phosphate phosphatase                                                                          |
| <i>CUP1-1</i>                                                | -2.0               | copper binding metallothionein                                                                                  |
| <i>CUP1-2</i>                                                | -2.1               | copper binding metallothionein                                                                                  |
| <i>VMA22</i>                                                 | -1.9               | required for V-ATPase activity                                                                                  |
| <i>LRP1</i>                                                  | -1.6               | like rRNA Processing protein involved in regulation of DNA repair and recombination                             |
| <i>SPL2</i>                                                  | -1.7               | suppressor of plc-1-delta                                                                                       |
| <i>EST3</i>                                                  | -1.8               | Subunit of the telomerase                                                                                       |
| <i>QDR1</i>                                                  | -0.9               | multidrug resistance transporter                                                                                |
| <i>ASF1</i>                                                  | -1.1               | anti-silencing protein that causes depression of silent loci when overexpressed                                 |
| <i>RPB4</i>                                                  | -1.0               | RNA polymerase II fourth largest subunit                                                                        |
| <i>PFD1</i>                                                  | -1.3               | bovine prefoldin subunit 1 homolog (putative)                                                                   |
| <i>GON7</i>                                                  | -1.4               | protein proposed to be involved in the transfer of mannosylphosphate groups onto N-linked oligosaccharides      |
| <i>KTI12</i>                                                 | -1.1               | elongator associated protein                                                                                    |
| <i>YKR049C</i>                                               | -1.0               | protein localized to the mitochondria                                                                           |
| <i>RPS21A</i>                                                | -1.2               | ribosomal protein S21A (S26A) (YS25)                                                                            |
| <i>TRX1</i>                                                  | -1.0               | thioredoxin                                                                                                     |
| <i>ASP3-1</i>                                                | -1.2               | nitrogen catabolite-regulated cell-wall L-asparaginase II                                                       |
| <i>ASP3-2</i>                                                | -1.0               | nitrogen catabolite-regulated cell-wall L-asparaginase II                                                       |
| <i>ASP3-3</i>                                                | -1.0               | nitrogen catabolite-regulated cell-wall L-asparaginase II                                                       |
| <i>ASP3-4</i>                                                | -1.2               | nitrogen catabolite-regulated cell-wall L-asparaginase II                                                       |

| Gene name    | Fold change | Gene Product                                                                                                |
|--------------|-------------|-------------------------------------------------------------------------------------------------------------|
| <i>PDR8</i>  | -1.1        | zinc finger transcription factor                                                                            |
| <i>TRM9</i>  | -0.9        | mcm5U/mcm5s2U tRNA carboxyl methyltransferase                                                               |
| <i>HUG1</i>  | -1.3        | protein involved in the Mec1p-mediated checkpoint pathway that responds to DNA damage or replication arrest |
| <i>SIP18</i> | -1.1        | salt-Induced Protein                                                                                        |
| <i>HOR7</i>  | -1.2        | hyperosmolarity-responsive gene                                                                             |
| <i>ATX1</i>  | -1.4        | copper binding homeostasis protein (putative)                                                               |
| <i>ZEO1</i>  | -2.1        | Mid2p-interacting protein, modulates the PKC1-MPK1 cell integrity pathway                                   |
| <i>HSP10</i> | -1.6        | heat shock protein 10                                                                                       |
| <i>CIN5</i>  | -1.1        | transcriptional activator                                                                                   |
| <i>MGE1</i>  | -0.9        | GrpE homolog                                                                                                |
| <i>RFM1</i>  | -1.0        | DNA-binding protein                                                                                         |
| <i>ARR2</i>  | -1.9        | arsenate reductase                                                                                          |

#### Interaction with the environment

|                  |      |                                                                                                                            |
|------------------|------|----------------------------------------------------------------------------------------------------------------------------|
| <i>YBL028C</i>   | -2.1 | questionable protein                                                                                                       |
| <i>SRB6</i>      | -2.1 | part of Srb/Mediator complex; transcription factor                                                                         |
| <i>HMLALPHA1</i> | -1.6 | mating type regulatory protein, silenced copy at HML                                                                       |
| <i>HMLALPHA2</i> | -2.7 | mating type regulatory protein, silenced copy at HML                                                                       |
| <i>MATALPHA2</i> | -3.0 | mating type regulatory protein, expressed copy at MAT locus                                                                |
| <i>MATALPHA1</i> | -1.5 | mating type regulatory protein, expressed copy at MAT locus                                                                |
| <i>HMRA2</i>     | -3.0 | mating type regulatory protein, silenced copy at HMR locus                                                                 |
| <i>HMRA1</i>     | -2.0 | mating type regulatory protein, silenced copy at HMR locus                                                                 |
| <i>CDC36</i>     | -1.1 | basal transcription inhibitor; transcriptional regulator                                                                   |
| <i>RAD57</i>     | -1.2 | RecA homolog; interacts with Rad 55p                                                                                       |
| <i>NRG1</i>      | -1.6 | binds to UAS-1 in the STA1 promoter and can interact with Ssn6; transcriptional repressor                                  |
| <i>SNF11</i>     | -1.4 | SWI/SNF global transcription activator complex component                                                                   |
| <i>CSN9</i>      | -2.7 | COP9 signalosome (CSN) subunit                                                                                             |
| <i>MFA1</i>      | -2.0 | a-factor mating pheromone precursor                                                                                        |
| <i>SLF1</i>      | -1.1 | La motif-containing proteins that modulate mRNA translation                                                                |
| <i>FAR7</i>      | -1.0 | protein involved in G1 cell cycle arrest in response to pheromone, in a pathway different from the Far1p-dependent pathway |
| <i>AGA2</i>      | -1.4 | a-agglutinin adhesion subunit                                                                                              |
| <i>VMA7</i>      | -1.2 | vacuolar ATPase V1 domain subunit F (14 kDa)                                                                               |
| <i>SNF6</i>      | -0.9 | chromatin remodeling Snf/Swi complex subunit                                                                               |
| <i>VMA10</i>     | -1.2 | vacuolar ATPase V1 domain subunit G (13 kDa)                                                                               |
| <i>VMA22</i>     | -1.9 | required for V-ATPase activity                                                                                             |
| <i>SPL2</i>      | -1.7 | suppressor of plc1-delta                                                                                                   |
| <i>STE18</i>     | -1.6 | G protein gamma subunit; coupled to mating factor receptor                                                                 |
| <i>VPH2</i>      | -1.0 | 25.2 kDa protein involved in assembly of vacuolar H(+) ATPase                                                              |
| <i>COX17</i>     | -1.5 | cysteine-rich protein                                                                                                      |
| <i>ZRT2</i>      | -0.9 | low affinity zinc transport protein                                                                                        |
| <i>KAR5</i>      | -1.1 | coiled-coil membrane protein                                                                                               |
| <i>SAP30</i>     | -1.7 | subunit of the histone deacetylase B complex                                                                               |
| <i>MFA2</i>      | -1.7 | a-factor mating pheromone precursor                                                                                        |
| <i>KAR1</i>      | -1.0 | involved in spindle pole body duplication and karyogamy                                                                    |
| <i>ATX1</i>      | -1.4 | copper binding homeostasis protein (putative)                                                                              |
| <i>HUB1</i>      | -1.5 | ubiquitin-like modifier                                                                                                    |
| <i>YOL101C</i>   | -0.9 | questionable protein                                                                                                       |
| <i>CIN5</i>      | -1.1 | transcriptional activator                                                                                                  |
| <i>ISU1</i>      | -1.1 | iron-sulfur cluster nifU-like protein                                                                                      |
| <i>TFP3</i>      | -1.1 | vacuolar ATPase V0 domain subunit c' (17 kDa) vacuolar H(+) ATPase 17 kDa subunit C                                        |
| <i>ATP15</i>     | -1.3 | ATP synthase epsilon subunit                                                                                               |
| <i>RDS3</i>      | -2.0 | protein required for cell viability                                                                                        |

| Gene name                                                | Fold change | Gene Product                                                                          |
|----------------------------------------------------------|-------------|---------------------------------------------------------------------------------------|
| <b>Transposable elements, viral and plasmid proteins</b> |             |                                                                                       |
| <i>MAK31</i>                                             | -1.8        | member of the Sm protein family                                                       |
| <i>RTT102</i>                                            | -0.9        | regulator of Ty1 Transposition                                                        |
| <b>Cell fate</b>                                         |             |                                                                                       |
| <i>NHP6B</i>                                             | -1.2        | 11 kDa nonhistone chromosomal protein                                                 |
| <i>SPR6</i>                                              | -1.3        | sporulation-specific protein                                                          |
| <i>ASF1</i>                                              | -1.1        | anti-silencing protein that causes depression of silent loci when overexpressed       |
| <i>YKL082C</i>                                           | -0.9        | required for normal pre-rRNA Processing                                               |
| <i>KTI12</i>                                             | -1.1        | elongator associated protein                                                          |
| <i>DAD2</i>                                              | -1.3        | outer kinetochore protein - part of Dam1 complex                                      |
| <i>BUB2</i>                                              | -0.9        | protein required for cell cycle arrest in response to loss of microtubule function    |
| <i>SAP30</i>                                             | -1.7        | subunit of the histone deacetylase B complex                                          |
| <i>YMR269W</i>                                           | -2.2        | protein possibly involved in protein synthesis                                        |
| <i>HUB1</i>                                              | -1.5        | ubiquitin-like modifier                                                               |
| <b>Development (Systemic)</b>                            |             |                                                                                       |
| <i>HMLALPHA1</i>                                         | -1.6        | mating type regulatory protein, silenced copy at HML                                  |
| <i>HMLALPHA2</i>                                         | -2.7        | mating type regulatory protein, silenced copy at HML                                  |
| <i>MATALPHA2</i>                                         | -3.0        | mating type regulatory protein, expressed copy at MAT locus                           |
| <i>MATALPHA1</i>                                         | -1.5        | mating type regulatory protein, expressed copy at MAT locus                           |
| <i>HMRA1</i>                                             | -2.0        | mating type regulatory protein, silenced copy at HMR locus                            |
| <i>AGA2</i>                                              | -1.4        | a-agglutinin adhesion subunit                                                         |
| <i>KAR5</i>                                              | -1.1        | coiled-coil membrane protein                                                          |
| <i>KAR1</i>                                              | -1.0        | involved in spindle pole body duplication and karyogamy                               |
| <i>HUB1</i>                                              | -1.5        | ubiquitin-like modifier                                                               |
| <b>Biogenesis of cellular components</b>                 |             |                                                                                       |
| <i>ACS1</i>                                              | -1.5        | acetyl CoA synthetase                                                                 |
| <i>ECM1</i>                                              | -1.7        | putative transmembrane domain protein involved in cell wall biogenesis                |
| <i>LDB7</i>                                              | -0.9        | protein involved in mannosylphosphorylation of cell wall mannoproteins                |
| <i>RER2</i>                                              | -0.9        | cis-prenyltransferase                                                                 |
| <i>MRS5</i>                                              | -1.0        | involved in mitochondrial biogenesis                                                  |
| <i>ATG12</i>                                             | -2.3        | component of the autophagic system                                                    |
| <i>SHG1</i>                                              | -1.5        | compass (complex proteins associated with Set1p) component                            |
| <i>YPT10</i>                                             | -1.0        | similar to Rab proteins and other small GTP-binding proteins                          |
| <i>MRPL37</i>                                            | -1.3        | mitochondrial ribosomal protein of the large subunit                                  |
| <i>MRPL27</i>                                            | -1.7        | mitochondrial ribosomal protein of the large subunit                                  |
| <i>CTP1</i>                                              | -1.2        | citrate transporter                                                                   |
| <i>MRPL32</i>                                            | -1.7        | ribosomal protein (YmL32)                                                             |
| <i>PET18</i>                                             | -2.2        | protein required for respiratory growth and stability of the mitochondrial genome     |
| <i>IMG2</i>                                              | -1.1        | mitochondrial ribosomal protein of the small subunit                                  |
| <i>PEX19</i>                                             | -1.2        | 40 kDa farnesylated protein associated with peroxisomes                               |
| <i>RAD57</i>                                             | -1.2        | RecA homolog; interacts with Rad 55p                                                  |
| <i>DAD1</i>                                              | -1.7        | Duo1 and Dam1 interacting; localized to intranuclear spindles and spindle pole bodies |
| <i>STN1</i>                                              | -1.2        | involved in telomere length regulation                                                |
| <i>YDR115W</i>                                           | -1.4        | questionable protein                                                                  |
| <i>TAF10</i>                                             | -1.2        | TFIID subunit                                                                         |
| <i>SPC19</i>                                             | -1.2        | spindle pole component                                                                |
| <i>DYN2</i>                                              | -2.1        | dynein light chain (putative)                                                         |
| <i>ADA2</i>                                              | -1.4        | general transcriptional adaptor or co-activator                                       |
| <i>GIM4</i>                                              | -2.0        | bovine prefoldin subunit 2 homolog (putative)                                         |



| <b>Gene name</b> | <b>Fold change</b> | <b>Gene Product</b>                                                                                        |
|------------------|--------------------|------------------------------------------------------------------------------------------------------------|
| <i>TIM9</i>      | -1.8               | essential subunit of the TIM22-complex for mitochondrial protein import                                    |
| <i>BIM1</i>      | -2.0               | binding to microtubules                                                                                    |
| <i>RSM18</i>     | -1.1               | mitochondrial ribosome small subunit component                                                             |
| <i>SPR6</i>      | -1.3               | sporulation-specific protein                                                                               |
| <i>MDM39</i>     | -1.2               | spore wall formation. Mitochondrial distribution and morphology                                            |
| <i>CGR1</i>      | -2.3               | coiled-coil protein                                                                                        |
| <i>BRR6</i>      | -1.5               | nuclear envelope protein                                                                                   |
| <i>MRPL25</i>    | -1.3               | mitochondrial ribosomal protein of the large subunit                                                       |
| <i>TRX2</i>      | -1.0               | thioredoxin                                                                                                |
| <i>RSM27</i>     | -2.0               | mitochondrial ribosome small subunit component                                                             |
| <i>PEX21</i>     | -1.3               | peroxin                                                                                                    |
| <i>MRS11</i>     | -1.4               | subunit of the Tim22-complex                                                                               |
| <i>EST3</i>      | -1.8               | Subunit of the telomerase                                                                                  |
| <i>YRB2</i>      | -0.9               | nuclear protein that interacts with Gsp1p and Crm1p                                                        |
| <i>SYS1</i>      | -1.0               | multicopy suppressor of ypt6 null mutation                                                                 |
| <i>MRPL49</i>    | -0.9               | mitochondrial ribosomal protein of the large subunit                                                       |
| <i>YJL104W</i>   | -0.9               | presequence translocase-associated motor, constituent of the mitochondrial import motor PAM                |
| <i>RPA34</i>     | -1.5               | RNA polymerase I subunit A34.5                                                                             |
| <i>PFD1</i>      | -1.3               | bovine prefoldin subunit 1 homolog (putative)                                                              |
| <i>GON7</i>      | -1.4               | protein proposed to be involved in the transfer of mannosylphosphate groups onto N-linked oligosaccharides |
| <i>ABM1</i>      | -2.0               | protein of unknown function, required for normal microtubule organization                                  |
| <i>MRP17</i>     | -1.5               | ribosomal protein MRP17                                                                                    |
| <i>YKL082C</i>   | -0.9               | required for normal pre-rRNA Processing                                                                    |
| <i>MRPL31</i>    | -1.0               | mitochondrial ribosomal protein of the large subunit                                                       |
| <i>DAD2</i>      | -1.3               | outer kinetochore protein - part of Dam1 complex                                                           |
| <i>TEN1</i>      | -2.3               | protein involved in Telomeric pathways in association with Stn1                                            |
| <i>TRX1</i>      | -1.0               | thioredoxin                                                                                                |
| <i>YKE2</i>      | -1.1               | Gim complex component                                                                                      |
| <i>MRPL15</i>    | -1.4               | mitochondrial ribosomal protein of the large subunit                                                       |
| <i>MRPL39</i>    | -1.2               | mitochondrial ribosomal protein of the large subunit                                                       |
| <i>BUB2</i>      | -0.9               | protein required for cell cycle arrest in response to loss of microtubule function                         |
| <i>KAR5</i>      | -1.1               | coiled-coil membrane protein                                                                               |
| <i>ABF2</i>      | -1.0               | HMG-1 homolog                                                                                              |
| <i>CIN4</i>      | -1.0               | GTP-binding protein                                                                                        |
| <i>MRPS8</i>     | -1.2               | mitochondrial ribosomal protein of the small subunit                                                       |
| <i>MRPS17</i>    | -0.9               | mitochondrial ribosomal protein of the small subunit                                                       |
| <i>MRPL44</i>    | -1.3               | mitochondrial ribosomal protein of the large subunit                                                       |
| <i>TAF9</i>      | -1.2               | TFIID subunit                                                                                              |
| <i>MRPL33</i>    | -1.6               | mitochondrial ribosomal protein of the large subunit                                                       |
| <i>JNM1</i>      | -1.1               | coiled-coil domain protein required for proper nuclear migration during mitosis                            |
| <i>YMR299C</i>   | -1.3               | protein of unknown function; GFP-fusion protein localizes to the cytoplasm                                 |
| <i>GIM3</i>      | -1.4               | bovine prefoldin subunit 4 homolog (putative)                                                              |
| <i>KAR1</i>      | -1.0               | involved in spindle pole body duplication and karyogamy                                                    |
| <i>YNL213C</i>   | -1.2               | questionable protein                                                                                       |
| <i>MRPL50</i>    | -1.2               | mitochondrial ribosomal protein of the large subunit, not essential for mitochondrial translation          |
| <i>RSM19</i>     | -1.0               | mitochondrial ribosome small subunit component                                                             |
| <i>MDM12</i>     | -1.2               | mitochondrial outer membrane protein                                                                       |
| <i>ZEO1</i>      | -2.1               | Mid2p-interacting protein, modulates the PKC1-MPK1 cell integrity pathway                                  |
| <i>HSP10</i>     | -1.6               | heat shock protein 10                                                                                      |
| <i>YNG1</i>      | -1.0               | histone acetyltransferase complex component                                                                |
| <i>SPC29</i>     | -1.3               | spindle pole body component                                                                                |

| <b>Gene name</b>                 | <b>Fold change</b> | <b>Gene Product</b>                                                                                           |
|----------------------------------|--------------------|---------------------------------------------------------------------------------------------------------------|
| <i>SPP1</i>                      | -0.9               | compass (complex proteins associated with Set1p) component                                                    |
| <i>ATG5</i>                      | -1.6               | Involved in autophagy                                                                                         |
| <i>YPL250C</i>                   | -1.3               | Protein that interacts with the cytoskeleton and is involved in chromatin organization and nuclear transport  |
| <i>MRPL51</i>                    | -1.1               | mitochondrial ribosomal protein of the large subunit                                                          |
| <i>MRP2</i>                      | -0.9               | mitochondrial ribosomal protein, small subunit                                                                |
| <b>Cell type differentiation</b> |                    |                                                                                                               |
| <i>NRG2</i>                      | -1.6               | NRG1 homolog                                                                                                  |
| <i>NHP6B</i>                     | -1.2               | 11 kDa nonhistone chromosomal protein                                                                         |
| <i>SRB6</i>                      | -2.1               | part of Srb/Mediator complex; transcription factor                                                            |
| <i>BUD23</i>                     | -1.0               | protein involved in bud-site selection                                                                        |
| <i>NRG1</i>                      | -1.6               | binds to UAS-1 in the STA1 promoter and can interact with Ssn6; transcriptional repressor                     |
| <i>UBC1</i>                      | -1.2               | ubiquitin-conjugating enzyme                                                                                  |
| <i>SEM1</i>                      | -2.6               | Regulator of exocytosis and pseudohyphal differentiation                                                      |
| <i>EMI1</i>                      | -1.5               | early meiotic induction                                                                                       |
| <i>SPO73</i>                     | -1.4               | meiosis-specific protein of unknown function, required for spore wall formation during sporulation            |
| <i>SPR6</i>                      | -1.3               | sporulation-specific protein                                                                                  |
| <i>ISC10</i>                     | -1.7               | meiosis-specific protein required for spore formation                                                         |
| <i>ERV14</i>                     | -0.9               | 14 kDa protein found on ER-derived vesicles                                                                   |
| <i>SPO12</i>                     | -1.5               | sporulation protein                                                                                           |
| <i>SPO16</i>                     | -1.0               | sporulation protein                                                                                           |
| <i>SSP1</i>                      | -1.2               | essential for meiosis and spore formation                                                                     |
| <i>YKL082C</i>                   | -0.9               | required for normal pre-rRNA Processing                                                                       |
| <i>DAD2</i>                      | -1.3               | outer kinetochore protein - part of Dam1 complex                                                              |
| <i>BUD20</i>                     | -1.8               | protein involved in bud-site selection                                                                        |
| <i>ADY4</i>                      | -0.9               | component of the meiotic outer plaque                                                                         |
| <i>BUB2</i>                      | -0.9               | protein required for cell cycle arrest in response to loss of microtubule function                            |
| <i>SAP30</i>                     | -1.7               | subunit of the histone deacetylase B complex                                                                  |
| <i>SPO1</i>                      | -0.9               | similar to phospholipase B                                                                                    |
| <i>SPR1</i>                      | -1.1               | exo-1,3-beta-glucanase, sporulation-specific                                                                  |
| <i>YOR304C-A</i>                 | -1.1               | protein of unknown function; GFP-fusion protein localizes to the cell periphery, cytoplasm, bud, and bud neck |
| <i>SPS4</i>                      | -1.6               | sporulation-specific protein                                                                                  |
| <b>Unclassified proteins</b>     |                    |                                                                                                               |
| <i>YAL037W</i>                   | -1.3               | questionable protein                                                                                          |
| <i>YAL044W-A</i>                 | -1.0               | similar to pombe uvi31, putative DNA repair protein                                                           |
| <i>YAR023C</i>                   | -1.3               | putative integral membrane protein, member of DUP240 gene family                                              |
| <i>YAR069C</i>                   | -1.0               | questionable protein                                                                                          |
| <i>YBL029C-A</i>                 | -1.4               | protein of unknown function; GFP-fusion protein localizes to the cell periphery                               |
| <i>MOH1</i>                      | -0.9               | questionable protein                                                                                          |
| <i>YBL059W</i>                   | -1.1               | questionable protein                                                                                          |
| <i>YBL107C</i>                   | -1.4               | questionable protein                                                                                          |
| <i>YBL108C-A</i>                 | -1.1               | questionable protein                                                                                          |
| <i>YBR062C</i>                   | -1.2               | questionable protein                                                                                          |
| <i>YBR262C</i>                   | -2.1               | protein localized to the mitochondria                                                                         |
| <i>YCL056C</i>                   | -1.7               | protein of unknown function; GFP-fusion protein localizes to the cytoplasm                                    |
| <i>YCR007C</i>                   | -1.4               | putative integral membrane protein, member of DUP240 gene family                                              |
| <i>YCR016W</i>                   | -1.0               | questionable protein                                                                                          |
| <i>YCR022C</i>                   | -1.1               | questionable protein                                                                                          |
| <i>YCR097W-A</i>                 | -1.6               | questionable protein                                                                                          |
| <i>YCR102C</i>                   | -1.2               | questionable protein                                                                                          |

| <b>Gene name</b> | <b>Fold change</b> | <b>Gene Product</b>                                                                           |
|------------------|--------------------|-----------------------------------------------------------------------------------------------|
| <i>YDL099W</i>   | -1.1               | protein of unknown function; GFP-fusion protein localizes to the cytoplasm                    |
| <i>YDL114W-A</i> | -1.7               | questionable protein                                                                          |
| <i>YDL121C</i>   | -1.2               | questionable protein                                                                          |
| <i>YDL133W</i>   | -1.3               | questionable protein                                                                          |
| <i>YDL156W</i>   | -1.1               | questionable protein                                                                          |
| <i>YDL157C</i>   | -1.1               | questionable protein                                                                          |
| <i>YDL159W-A</i> | -1.1               | questionable protein                                                                          |
| <i>YDL177C</i>   | -1.6               | questionable protein                                                                          |
| <i>YDL240C-A</i> | -1.4               | questionable protein                                                                          |
| <i>YDL247W-A</i> | -1.7               | questionable protein                                                                          |
| <i>DOS2</i>      | -1.1               | protein of unknown function, GFP-fusion protein localizes to the cytoplasm                    |
| <i>SHU2</i>      | -1.7               | suppressor of hydroxy-urea sensitivity                                                        |
| <i>YDR210W</i>   | -1.4               | protein of unknown function; GFP-fusion protein localizes to the cell periphery               |
| <i>BSC2</i>      | -1.3               | transcript encoded by this ORF shows a high level of stop codon bypass                        |
| <i>PHM6</i>      | -2.2               | protein of unknown function, expression is regulated by phosphate levels                      |
| <i>YDR336W</i>   | -1.0               | questionable protein                                                                          |
| <i>YDR339C</i>   | -1.2               | protein required for cell viability                                                           |
| <i>YDR357C</i>   | -1.2               | protein of unknown function; GFP-fusion protein localizes to the cytoplasm                    |
| <i>BCP1</i>      | -0.9               | questionable protein                                                                          |
| <i>YDR379C-A</i> | -1.2               | questionable protein                                                                          |
| <i>YDR381C-A</i> | -2.1               | questionable protein                                                                          |
| <i>NKP1</i>      | -1.3               | non-essential kinetochore protein                                                             |
| <i>CWC21</i>     | -1.2               | component of a complex containing Cef1p, putatively involved in pre-mRNA splicing             |
| <i>YDR532C</i>   | -1.5               | questionable protein                                                                          |
| <i>YEL018W</i>   | -1.2               | stable stoichiometric subunit of the NuA4 complex                                             |
| <i>YEL028W</i>   | -1.3               | questionable protein                                                                          |
| <i>IES6</i>      | -1.7               | protein that associates with the INO80 chromatin remodeling complex under low-salt conditions |
| <i>YEL048C</i>   | -2.1               | questionable protein                                                                          |
| <i>RMD6</i>      | -1.9               | required for meiotic nuclear division                                                         |
| <i>YEL073C</i>   | -0.9               | questionable protein                                                                          |
| <i>YER030W</i>   | -1.5               | questionable protein                                                                          |
| <i>YER039C-A</i> | -1.1               | questionable protein                                                                          |
| <i>YER071C</i>   | -0.9               | protein of unknown function; GFP-fusion protein localizes to the cytoplasm                    |
| <i>IES5</i>      | -1.1               | protein that associates with the INO80 chromatin remodeling complex under low-salt conditions |
| <i>YER093C-A</i> | -1.3               | questionable protein                                                                          |
| <i>YER121W</i>   | -1.7               | questionable protein                                                                          |
| <i>YER137C</i>   | -1.7               | questionable protein                                                                          |
| <i>YER182W</i>   | -1.2               | protein localized to the mitochondria                                                         |
| <i>YFR026C</i>   | -1.6               | questionable protein                                                                          |
| <i>YFR043C</i>   | -1.1               | questionable protein                                                                          |
| <i>YGL050W</i>   | -1.1               | questionable protein                                                                          |
| <i>YGL080W</i>   | -0.9               | protein localized to the mitochondria                                                         |
| <i>YGL108C</i>   | -1.3               | protein of unknown function; GFP-fusion protein localizes to the cell periphery               |
| <i>YGL220W</i>   | -1.4               | questionable protein                                                                          |
| <i>YGR021W</i>   | -1.1               | questionable protein                                                                          |
| <i>YGR035C</i>   | -1.8               | protein of unknown function, potential Cdc28p substrate                                       |
| <i>YGR042W</i>   | -1.2               | questionable protein                                                                          |
| <i>YGR153W</i>   | -1.0               | questionable protein                                                                          |
| <i>YGR154C</i>   | -0.9               | questionable protein                                                                          |
| <i>YGR168C</i>   | -1.3               | questionable protein                                                                          |
| <i>YGR206W</i>   | -1.1               | questionable protein                                                                          |
| <i>YGR243W</i>   | -1.9               | protein localized to mitochondria                                                             |

| <b>Gene name</b> | <b>Fold change</b> | <b>Gene Product</b>                                                                 |
|------------------|--------------------|-------------------------------------------------------------------------------------|
| <i>YHL013C</i>   | -1.0               | questionable protein                                                                |
| <i>YHL042W</i>   | -1.2               | questionable protein                                                                |
| <i>YHL045W</i>   | -1.2               | questionable protein                                                                |
| <i>FYV4</i>      | -0.9               | protein of unknown function, required for survival upon exposure to K1 killer toxin |
| <i>YHR132W-A</i> | -0.9               | questionable protein                                                                |
| <i>YHR162W</i>   | -1.0               | questionable protein                                                                |
| <i>KRE27</i>     | -1.3               | killer toxin resistant                                                              |
| <i>YIL029C</i>   | -1.8               | questionable protein                                                                |
| <i>YIL089W</i>   | -1.0               | questionable protein                                                                |
| <i>YIL127C</i>   | -2.0               | questionable protein                                                                |
| <i>YIL158W</i>   | -1.5               | questionable protein                                                                |
| <i>YIL161W</i>   | -1.6               | questionable protein                                                                |
| <i>YIL165C</i>   | -1.4               | questionable protein                                                                |
| <i>SDL1</i>      | -1.7               | L-serine dehydratase                                                                |
| <i>YJL049W</i>   | -1.1               | questionable protein                                                                |
| <i>ICS3</i>      | -1.3               | protein of unknown function                                                         |
| <i>YJL118W</i>   | -0.9               | questionable protein                                                                |
| <i>YJL122W</i>   | -1.3               | questionable protein                                                                |
| <i>YJL156W-A</i> | -1.3               | questionable protein                                                                |
| <i>YJR011C</i>   | -1.1               | questionable protein                                                                |
| <i>YJR012C</i>   | -1.1               | protein required for cell viability                                                 |
| <i>YAE1</i>      | -1.6               | essential protein of unknown function                                               |
| <i>YJR079W</i>   | -1.0               | questionable protein                                                                |
| <i>YJR082C</i>   | -1.6               | stable subunit of the NuA4 complex                                                  |
| <i>YJR085C</i>   | -1.3               | questionable protein                                                                |
| <i>YKL018C-A</i> | -1.4               | questionable protein                                                                |
| <i>YKL061W</i>   | -1.0               | questionable protein                                                                |
| <i>YKL133C</i>   | -1.0               | questionable protein                                                                |
| <i>YKL137W</i>   | -1.1               | questionable protein                                                                |
| <i>YKR075C</i>   | -1.5               | questionable protein                                                                |
| <i>YLL014W</i>   | -2.3               | questionable protein                                                                |
| <i>YLR036C</i>   | -0.9               | questionable protein                                                                |
| <i>YLR051C</i>   | -1.4               | protein required for cell viability                                                 |
| <i>YLR065C</i>   | -1.1               | questionable protein                                                                |
| <i>YLR073C</i>   | -1.4               | questionable protein                                                                |
| <i>YLR099W-A</i> | -1.2               | questionable protein                                                                |
| <i>YLR104W</i>   | -1.5               | questionable protein                                                                |
| <i>YLR108C</i>   | -1.0               | questionable protein                                                                |
| <i>YLR112W</i>   | -1.4               | questionable protein                                                                |
| <i>YLR126C</i>   | -1.1               | questionable protein                                                                |
| <i>QRI5</i>      | -2.4               | mitochondrial protein of unknown function                                           |
| <i>YLR211C</i>   | -1.2               | questionable protein                                                                |
| <i>YLR218C</i>   | -1.1               | questionable protein                                                                |
| <i>YLR254C</i>   | -1.2               | questionable protein                                                                |
| <i>TMA7</i>      | -1.9               | protein putative involved in cytoplasmic ribosome function                          |
| <i>YLR281C</i>   | -1.5               | questionable protein                                                                |
| <i>YLR346C</i>   | -1.6               | protein of unknown function; expression regulated by PDR1                           |
| <i>YLR363W-A</i> | -1.5               | questionable protein                                                                |
| <i>YLR376C</i>   | -1.4               | platinum sensitivity protein                                                        |
| <i>YLR408C</i>   | -1.6               | questionable protein                                                                |
| <i>YLR456W</i>   | -1.5               | questionable protein                                                                |
| <i>YLR460C</i>   | -1.1               | questionable protein                                                                |
| <i>YML011C</i>   | -1.0               | questionable protein                                                                |
| <i>YML053C</i>   | -1.0               | questionable protein                                                                |
| <i>YML108W</i>   | -1.5               | protein of unknown function localised to cytoplasm and nucleus                      |
| <i>YML119W</i>   | -0.9               | questionable protein                                                                |

| <b>Gene name</b> | <b>Fold change</b> | <b>Gene Product</b>                                                                                          |
|------------------|--------------------|--------------------------------------------------------------------------------------------------------------|
| <i>YMR003W</i>   | -1.3               | questionable protein                                                                                         |
| <i>YMR040W</i>   | -2.5               | questionable protein                                                                                         |
| <i>YMR071C</i>   | -1.1               | integral membrane protein                                                                                    |
| <i>YMR114C</i>   | -2.3               | questionable protein                                                                                         |
| <i>YMR132C</i>   | -1.3               | questionable protein                                                                                         |
| <i>ICY1</i>      | -1.0               | Protein that interacts with the cytoskeleton and is involved in chromatin organization and nuclear transport |
| <i>YNL024C</i>   | -1.4               | putative S-adenosylmethionine-dependent methyltransferase of the seven beta-strand family                    |
| <i>YNL046W</i>   | -1.9               | questionable protein                                                                                         |
| <i>YNL056W</i>   | -1.1               | questionable protein                                                                                         |
| <i>YNL100W</i>   | -0.9               | questionable protein                                                                                         |
| <i>YNL122C</i>   | -1.2               | questionable protein                                                                                         |
| <i>YNL149C</i>   | -1.2               | protein required for cell viability                                                                          |
| <i>YNL157W</i>   | -1.1               | questionable protein                                                                                         |
| <i>YNL211C</i>   | -2.1               | questionable protein                                                                                         |
| <i>YNR004W</i>   | -0.9               | questionable protein                                                                                         |
| <i>YNR020C</i>   | -1.4               | questionable protein                                                                                         |
| <i>YNR024W</i>   | -2.1               | questionable protein                                                                                         |
| <i>YNR040W</i>   | -1.0               | questionable protein                                                                                         |
| <i>YOL014W</i>   | -1.5               | questionable protein                                                                                         |
| <i>YOR012W</i>   | -1.2               | questionable protein                                                                                         |
| <i>YOR013W</i>   | -1.4               | questionable protein                                                                                         |
| <i>YOR052C</i>   | -1.3               | questionable protein                                                                                         |
| <i>FYV12</i>     | -1.6               | protein required for survival upon exposure to K1 killer toxin                                               |
| <i>IES4</i>      | -1.1               | protein that associates with the INO80 chromatin remodeling complex under low-salt conditions                |
| <i>YOR252W</i>   | -1.5               | questionable protein                                                                                         |
| <i>YOR305W</i>   | -1.5               | questionable protein                                                                                         |
| <i>YOR318C</i>   | -1.2               | questionable protein                                                                                         |
| <i>YPL039W</i>   | -1.8               | questionable protein                                                                                         |
| <i>YPL071C</i>   | -1.9               | questionable protein                                                                                         |
| <i>YPL108W</i>   | -1.3               | questionable protein                                                                                         |
| <i>YPL144W</i>   | -0.9               | questionable protein                                                                                         |
| <i>YPL267W</i>   | -1.2               | questionable protein                                                                                         |
| <i>YPR074W-A</i> | -2.2               | questionable protein                                                                                         |
