# Supplementary material for: Quercetin Protects Saccharomyces cerevisiae against Oxidative Stress by Inducing Trehalose Biosynthesis and the Cell Wall Integrity Pathway
Source: PubMed Central journal article supplement (PMC3445532; doi:10.1371/journal.pone.0045494), 2012-09-18
Supplement: pone.0045494.s003.pdf [file pone.0045494.s003.pdf]

**Table S3. Transcription factors with documented direct regulation of genes induced by exposure to quercetin.**

Genes were analysed using YEASTRACT (www.yeasttract.com; Monteiro *et al.*, 2008) software and grouped by transcription factors.

| Transcription Factor | ORF/Genes                                                                                                                                                                                                                                                                                                                                                                                                                                                                                                                                                                | %*   | %** | Function                                                                                                                                                                                                                                         |
|----------------------|--------------------------------------------------------------------------------------------------------------------------------------------------------------------------------------------------------------------------------------------------------------------------------------------------------------------------------------------------------------------------------------------------------------------------------------------------------------------------------------------------------------------------------------------------------------------------|------|-----|--------------------------------------------------------------------------------------------------------------------------------------------------------------------------------------------------------------------------------------------------|
| Ste12p               | CDC19 FLC2 SWH1 FUI1 IRA1<br>DUR1,2 SHM1 ILV6 GLK1 YCL042w<br>YCL074w YCR061w ABP1 GPD1 STP4<br>SED1 SEC7 YDR170w-a ADR1 EFT2<br>PDR15 TOM1 YEL043w PRB1 BUD25<br>ZRG8 PTC2 CHD1 FRS2 HXK1<br>CWH41 PYC1 PIL1 SOL4 MGA1 ENO1<br>DED81 KSP1 SCH9 YHR214w-a BCY1<br>NEO1 SIM1 KGD1 YIL169c PAN1<br>PRY3 SCP160 URA2 SSC1 JSN1<br>CWP1 GFA1 APE2 EAP1 GAP1 ECM4<br>HSP104 GIS3 YPS1 PDC5 YLR162w<br>GSY2 ECM38 FKS1 FMP27 DAK1<br>HXT2 MYO5 SSO2 RKR1 TPS3 APC1<br>YNL190w VNX1 IRA2 HPF1 STI1<br>DFG16 CYT1 MSA1 INP53 LSC1<br>YOR343w-a YOR343w-b GDH1 CAM1<br>SEC16 FAS2 | 39.0 | 4.2 | Transcription factor that is activated by a MAP kinase signaling cascade, activates genes involved in mating or pseudohyphal/invasive growth pathways; cooperates with Tec1p transcription factor to regulate genes specific for invasive growth |
| Rap1p                | CDC19 FLC2 FUI1 YBL053w SDS24<br>GLK1 YCL042w SRB8 GPD1 STP4<br>SED1 SSD1 EFT2 RVS167 PDR15<br>EMI2 YEL043w ZRG8 PTC2 RSP5<br>DNF1 FRS2 HXK1 SCY1 ADE5,7<br>YGR054w PIL1 SOL4 MGA1 ENO1<br>BCY1 NEO1 BBC1 MHP1 NET1 PRY3<br>URA2 JSN1 APE2 EAP1 HSP104<br>YBT1 GIS3 YLR162w ECM38 VRP1<br>STE23 CAR2 TSL1 YMR086w GAD1<br>YNL190w ZWF1 BNI1 PHO91 FPK1<br>CUE5 PYK2 FAS2                                                                                                                                                                                                 | 25.9 | 3.9 | DNA-binding protein involved in either activation or repression of transcription, depending on binding site context; also binds telomere sequences and plays a role in telomeric position effect (silencing) and telomere structure              |
| Sok2p                | CDC19 FLC2 SWH1 FUI1 MEC1 SSE2<br>DUR1,2 YCL042w SRB8 GPD1 BSC1<br>YDL038c STP4 WHI4 NTH1 TPS2<br>SED1 KIN1 EFT2 NHX1 EMI2 PRB1<br>SEC3 ZRG8 HXK1 PYC1 PIL1 SOL4<br>MGA1 ENO1 SIM1 YIL169c MHP1<br>NET1 PRY3 CWP1 GAP1 ECM4 PDC5<br>FKS1 HXT2 ZWF1 PHO91 STI1<br>DFG16 WTM1 GDH1 CAM1 GIP3                                                                                                                                                                                                                                                                               | 21.5 | 4.7 | Nuclear protein that plays a regulatory role in the cyclic AMP (cAMP)-dependent protein kinase (PKA) signal transduction pathway; negatively regulates pseudohyphal differentiation; homologous to several transcription factors                 |
| Fhl1p                | CDC19 FUI1 TPS1 DUR1,2 SDS24<br>APE3 GLK1 YCL042w YCR061w TUP1<br>STP4 SED1 ADR1 EFT2 RVS167<br>PDR15 NPL3 YDR433w EMI2<br>YEL043w PRB1 ZRG8 PTC2 FRS2<br>PIL1 MGA1 ENO1 DED81 SIM1 MHP1<br>NET1 PRY3 MIR1 APE2 MMM1 YPS1<br>YLR162w VRP1 CAR2 TCB3 PYK2<br>GDH1 GIP3                                                                                                                                                                                                                                                                                                    | 18.9 | 4.9 | Transcriptional activator with similarity to DNA-binding domain of Drosophila forkhead but unable to bind DNA in vitro; required for rRNA processing; isolated as a suppressor of splicing factor prp4                                           |

|       |                                                                                                                                                                                                                                                |      |     |                                                                                                                                                                                                                                            |
|-------|------------------------------------------------------------------------------------------------------------------------------------------------------------------------------------------------------------------------------------------------|------|-----|--------------------------------------------------------------------------------------------------------------------------------------------------------------------------------------------------------------------------------------------|
| Sko1p | RPG1 AIM3 TPS1 GLK1 GPD1 BSC1<br>STP4 NTH1 TPS2 SED1 PDR15 ZRG8<br>KAP123 FRS2 HXK1 PYC1 PIL1 SOL4<br>MGA1 ENO1 RTC3 GRE3 SEC24<br>SIM1 SUC2 CWP1 EAP1 GAP1 ECM4<br>HSP104 DCS1 FKS1 STE23 DAK1<br>TSL1 MSC1 HXT2 RKR1 UBP15 ZWF1<br>STI1 GIP3 | 18.4 | 6.7 | Basic leucine zipper (bZIP) transcription factor of the ATF/CREB family, forms a complex with Tup1p and Ssn6p to both activate and repress transcription; cytosolic and nuclear protein involved in osmotic and oxidative stress responses |
| Skn7p | CDC19 SSE2 BSC1 TPS2 SED1<br>PDR15 FRS2 HXK1 CHC1 PIL1 SOL4<br>MGA1 DED81 SSC1 MIR1 SDH1<br>GAP1 DPS1 YPS1 GSY2 FKS1 TPS3<br>LAT1 APC1 ZWF1 PHO91 ARG1 IRA2<br>HPF1 YOR343w-a YOR343w-b GIP3<br>GPH1                                           | 14.5 | 5.2 | Nuclear response regulator and transcription factor, part of a branched two-component signaling system; required for optimal induction of heat-shock genes in response to oxidative stress; involved in osmoregulation                     |
| Yap6p | SWH1 SSE2 GPD1 BSC1 STP4 WHI4<br>SED1 EFT2 YEL043w BLM10 HXK1<br>ADE5,7 SOL4 MGA1 SEC24 SIM1<br>ATP2 GAP1 DPS1 TSL1 MSC1 ADE17<br>YMR196w RKR1 SRV2 WHI3 ZWF1<br>FPK1 ARG1 IRA2 HPF1 STI1                                                      | 14.0 | 5.1 | Putative basic leucine zipper (bZIP) transcription factor; overexpression increases sodium and lithium tolerance                                                                                                                           |
| Cin5p | CDC19 SSE2 DUR1,2 BSC1 STP4<br>WHI4 SED1 YEL043w SOL4 MGA1<br>SEC24 SIM1 NET1 PRY3 APE2 GAP1<br>MMM1 VRP1 MSC1 ADE17 GCV2<br>YMR196w ZWF1 ARG1 HPF1 STI1<br>DFG16 CYT1 WTM1                                                                    | 12.7 | 4.9 | Basic leucine zipper transcriptional factor of the yAP-1 family that mediates pleiotropic drug resistance and salt tolerance; localizes constitutively to the nucleus                                                                      |
| Tec1p | CDC19 FUI1 DUR1,2 YCR061w STP4<br>SED1 SEC7 EFT2 HXK1 PYC1 PIL1<br>MGA1 SIM1 URA2 CWP1 GFA1 APE2<br>GAP1 FKS1 TCB3 RKR1 ZWF1 SEC21<br>VNX1 ARG1 IRA2 DFG16 GDH1                                                                                | 12.3 | 4.9 | Transcription factor required for full Ty1 expression, Ty1-mediated gene activation, and haploid invasive and diploid pseudohyphal growth; TEA/ATTS DNA-binding domain family member                                                       |
| Yap5p | FLC2 DUR1,2 EMC1 YCL074w BPL1<br>WHI4 FRS2 ADE5,7 SOL4 MGA1<br>ENO1 RTC3 TAO3 MHP1 JSN1 GAP1<br>YLR162w DAK1 MSC1 ADE17 GCV2<br>YMR196w ARG1 HPF1 CYT1                                                                                         | 11.0 | 5.2 | basic leucine zipper (bZIP) transcription factor                                                                                                                                                                                           |
| Reb1p | WHI4 TOM1 ILV1 BLM10 RET2<br>YGR054w UBR1 ENO1 ECM29 THR1<br>SEC24 KGD1 NET1 GFA1 SDH1<br>VPS13 GIS3 YLR162w SEC61 GCV2<br>BNI1 PHO91 KRE5 FAS2                                                                                                | 10.5 | 4.7 | RNA polymerase I enhancer binding protein; DNA binding protein which binds to genes transcribed by both RNA polymerase I and RNA polymerase II; required for termination of RNA polymerase I transcription                                 |
| Phd1p | CDC19 SWH1 FUI1 EMC1 GPD1<br>BSC1 STP4 EFT2 NHX1 PRB1 ZRG8<br>SOL4 MGA1 SIM1 YIL169c PRY3<br>HXT2 ZWF1 ARG1 IRA2 STI1 DFG16<br>WTM1 CAM1                                                                                                       | 10.5 | 4.6 | Transcriptional activator that enhances pseudohyphal growth; regulates expression of FLO11, an adhesin required for pseudohyphal filament formation; similar to StuA, an A. nidulans developmental regulator; potential Cdc28p substrate   |

\* % of genes regulated by the transcription factor, relative to the total number of up regulated genes  
\*\* % of genes regulated by the transcription factor, relative to the number of genes regulated by the same transcription factor

#### Reference

Monteiro, P.T., Mendes, N., Teixeira, M.C., d'Orey, S., Tenreiro, S., Mira, N., et al. (2008)  
YEASTRACT-DISCOVERER: new tools to improve the analysis of transcriptional regulatory associations in *Saccharomyces cerevisiae*. *Nucl Acids Res* 36: D132-D136.
