# Supplementary material for: Quercetin Protects Saccharomyces cerevisiae against Oxidative Stress by Inducing Trehalose Biosynthesis and the Cell Wall Integrity Pathway
Source: PubMed Central journal article supplement (PMC3445532; doi:10.1371/journal.pone.0045494), 2012-09-18
Supplement: pone.0045494.s004.pdf [file pone.0045494.s004.pdf]

**Table S4. Transcription factors with documented direct regulation of genes repressed by exposure to quercetin.**

Genes were analysed using YEASTRACT ([www.yeasttract.com](http://www.yeasttract.com); Monteiro *et al.*, 2008) software and grouped by transcription factors.

| Transcription Factor | ORF/Genes                                                                                                                                                                                                                                                                                                                                                                                                                                                                                                                                                                                                                                                                                                                                                                                                                                                                                                                                                                                                                                                                                                                                                                                                                                            | %*   | %** | Function                                                                                                                                                                                                                                         |
|----------------------|------------------------------------------------------------------------------------------------------------------------------------------------------------------------------------------------------------------------------------------------------------------------------------------------------------------------------------------------------------------------------------------------------------------------------------------------------------------------------------------------------------------------------------------------------------------------------------------------------------------------------------------------------------------------------------------------------------------------------------------------------------------------------------------------------------------------------------------------------------------------------------------------------------------------------------------------------------------------------------------------------------------------------------------------------------------------------------------------------------------------------------------------------------------------------------------------------------------------------------------------------|------|-----|--------------------------------------------------------------------------------------------------------------------------------------------------------------------------------------------------------------------------------------------------|
| Ste12p               | ACS1 YAR023c HTA2 LDB7 LSM2<br>YBL029c-a RIB1 PRE7 MOH1 YBL059w<br>YBL107c PAU9 HHF1 HHT1 GAL10<br>QDR3 NRG2 POL30 YMC2 YSY6<br>NTC20 YPT10 MRPL37 YCL056c CIT2<br>YCR007c SRD1 YCR038w-a YCR097w-<br>a YCR102c APC11 YDL159w-a INH1<br>HEM3 YDL240c-a NRG1 RPC11 SNF11<br>SSS1 TAF10 CSN9 YDR210w HTA1<br>BSC2 PHM6 FCF1 SEM1 LSM6<br>YDR379c-a ADA2 MFA1 RPL27b UBC8<br>TIM9 IES6 TCA17 RMD6 SBH2 SPO73<br>RPS24a IES5 LSM4 YER137c LSM5<br>BUR6 ISC10 YER187w YPT1 LOC1<br>ULI1 RPL29 CGR1 AGA2 TYW3 ERV14<br>MTC3 YGR050c YGR131w YGR153w<br>GTO1 QCR9 PEX21 FMP43 YGR251w<br>PXR1 SNF6 YHL042w TIM10 RPL27a<br>FYV4 VMA22 IPI1 SPL2 SPO12 LIN1<br>EST3 QDR1 FLX1 NIT1 YAP5 RPC17<br>PET130 PAM16 ASF1 RPS21b RPB4<br>RPA34 YJL156w-a CYC1 YJR079w<br>RPL43b MRP17 KTI12 VPH2 MTR2<br>YKR012c JLP1 THI73 TEN1 TRX1 RFU1<br>BUD20 YLR099w-a YLR108c YLR112w<br>ZRT2 SMD3 YLR164w PUS5 RPL37a<br>YLR218c ADY4 NDL1 PDR8 SMD2<br>YLR281c RPS30a MRPL15 RPL38<br>YLR346c FBP1 LSM3 YLR456w ERV25<br>VPS71 YML053c KAR5 YMR114c SIP18<br>ICY1 TAF9 HOR7 URA10 HHF2<br>NCE103 YNL043c YNL046w MFA2<br>YNR071c YOL014w YOL106w INO4<br>ZEO1 BDS1 CIN5 TOM6 YOR052c<br>ARF3 RKI1 ORT1 SPP2 MBF1 RRG7<br>SPS4 YOR318c ISU1 POC4 PPT2 ICY2<br>SNT309 RRP15 | 29.0 | 8.5 | Transcription factor that is activated by a MAP kinase signaling cascade, activates genes involved in mating or pseudohyphal/invasive growth pathways; cooperates with Tec1p transcription factor to regulate genes specific for invasive growth |

|       |                                                                                                                                                                                                                                                                                                                                                                                                                                                                                                                                                                                                                                                                                                                                                                                                            |          |                                                                                                                                                                                                                                     |
|-------|------------------------------------------------------------------------------------------------------------------------------------------------------------------------------------------------------------------------------------------------------------------------------------------------------------------------------------------------------------------------------------------------------------------------------------------------------------------------------------------------------------------------------------------------------------------------------------------------------------------------------------------------------------------------------------------------------------------------------------------------------------------------------------------------------------|----------|-------------------------------------------------------------------------------------------------------------------------------------------------------------------------------------------------------------------------------------|
| Rap1p | POP5 ACS1 HAP3 YBL028c YBL029c-a<br>PRE7 MOH1 KTI11 NRG2 NTC20<br>HMLALPHA1 HMLALPHA2<br>MATALPHA2 MATALPHA1 IMG2<br>HMRA2 HMRA1 YCR097w-a APC11<br>YDL133w YDL187c NRG1 SSS1<br>YDR248c BSC2 PHM6 YDR336w ADA2<br>RPL27b TIM9 IES6 RMD6 YEL073c<br>CHZ1 SPO73 RPS24a IES5 RPL23b<br>LSM5 RPL22b YPI1 RPL29 QCR6 MTC3<br>YGR035c YGR050c YHL045w RPL27a<br>SPO12 AIM20 DAL7 RPC17 YJL049w<br>ICS3 MRPL49 ASF1 RPS21b RPA34<br>RPL39 NCE101 CYC1 APS2 RPL43b<br>MCM22 TIM8 SOR1 SFT1 MRT4 RRP14<br>KTI12 RPS27a RPS21a LDB18 THI73<br>RFU1 BUD20 YLR104w YLR112w<br>YLR164w RPL37a NDL1 RPS28b<br>RPS30a MRPL15 RPL38 RPS29a TRM9<br>RPS18b YML053c MRPL44 YNL024c<br>PGA2 GIM3 IGO1 ATX1 BIO3 ZEO1<br>HRT1 YSP3 YNG1 RKI1 RPS28a<br>RPS30b FYV12 RPL33b MBF1 SPS4<br>EEB1 ISU1 POC4 DAP1 OYE3 ICY2<br>BRR1 | 18.2 7.6 | DNA-binding protein involved in either activation or repression of transcription, depending on binding site context; also binds telomere sequences and plays a role in telomeric position effect (silencing) and telomere structure |
|-------|------------------------------------------------------------------------------------------------------------------------------------------------------------------------------------------------------------------------------------------------------------------------------------------------------------------------------------------------------------------------------------------------------------------------------------------------------------------------------------------------------------------------------------------------------------------------------------------------------------------------------------------------------------------------------------------------------------------------------------------------------------------------------------------------------------|----------|-------------------------------------------------------------------------------------------------------------------------------------------------------------------------------------------------------------------------------------|

|       |                                                                                                                                                                                                                                                                                                                                                                                                                                                         |          |                                                                                                                                                                                                        |
|-------|---------------------------------------------------------------------------------------------------------------------------------------------------------------------------------------------------------------------------------------------------------------------------------------------------------------------------------------------------------------------------------------------------------------------------------------------------------|----------|--------------------------------------------------------------------------------------------------------------------------------------------------------------------------------------------------------|
| Fhl1p | YBL028c PRE7 KTI11 NTC20 GRX1<br>CIT2 BUD23 YDL133w SNF11 BSC2<br>ADA2 RPL27b TIM9 IES6 SBH2 SPO73<br>RPS24a RPL23b YER137c LSM5<br>RPL22b RPL29 QCR6 VMA7 YGR021w<br>YGR050c SNF6 RPL27a SRB2<br>YHR162w ICS3 ASF1 RPS21b RPL39<br>RPL43b SOR1 SFT1 RPS27a RPS21a<br>TRX1 RFU1 BUD20 YLR112w RPL37a<br>NDL1 RPS28b RPS30a RPL38 RPS29a<br>LSM3 RPS18b YML053c MFT1 BUB2<br>ICY1 HOR7 HHF2 HHT2 ZEO1 RKI1<br>RPS30b FYV12 RPL33b SPS4 ISU1<br>POC4 ICY2 | 10.7 7.4 | Transcriptional activator with similarity to DNA-binding domain of Drosophila forkhead but unable to bind DNA in vitro; required for rRNA processing; isolated as a suppressor of splicing factor prp4 |
|-------|---------------------------------------------------------------------------------------------------------------------------------------------------------------------------------------------------------------------------------------------------------------------------------------------------------------------------------------------------------------------------------------------------------------------------------------------------------|----------|--------------------------------------------------------------------------------------------------------------------------------------------------------------------------------------------------------|

\* % of genes regulated by the transcription factor, relative to the total number of up regulated genes

\*\* % of genes regulated by the transcription factor, relative to the number of genes regulated by the same transcription factor

#### Reference

Monteiro, P.T., Mendes, N., Teixeira, M.C., d'Orey, S., Tenreiro, S., Mira, N., et al. (2008) YEASTRACT-DISCOVERER: new tools to improve the analysis of transcriptional regulatory associations in *Saccharomyces cerevisiae*. *Nucl Acids Res* 36: D132-D136.
